# Supplementary material for: Characterization of indole-3-pyruvic acid pathway-mediated biosynthesis of auxin in Neurospora crassa
Source: PubMed Central journal article supplement (PMC5805262; doi:10.1371/journal.pone.0192293), 2018-02-08
Supplement: pone.0192293.s001.pdf [file pone.0192293.s001.pdf]

*N. crassa* : --MGEALINGSGAVSNVSALETLGPAAKLTDADPSEIPPASGPGR-ENAVTISD-ILERRA : 57  
*U. maydis* : -----MTPSAQ : 6  
*A. macrogynus* : -----MFAQAVASRGRRVAVA : 16  
*A. nidulans* : ----- : -  
*B. cinerea* : -----MAPPTAIDIEGVVDTESIVLP-----DPLTVNGVSARRA : 34  
*B. dendrobatidis* : -----MTIASLLLRPVKHKCKAILSSAAISSSTMN : 29  
*C. albicans* : ----- : -  
*C. guilliermondii* : ----- : -  
*C. immitis* : -----MSPHAAQDAAVQGAVDITKET---PEPLTVAN-VPARRA : 35  
*C. neoformans* : ----- : -  
*C. tropicalis* : ----- : -  
*F. graminearum* : MLSAVRTARLRSLIKHSRTIHSSSKHLSSTEAAPAAPAHYDT---SOKLSAIDAVKERRL : 58  
*F. oxysporum* : ----- : -  
*M. oryzae* : ----- : -  
*P. brasiliensis* : -----MSPPGAVDPQIINNAD---P---PEPLTVAD-VPARRA : 31  
*P. nodorum* : -----MAPPSAIEVSAETDTSGITIPNPLTAPITSND-IFGRRK : 38  
*P. triticina* : ----- : -  
*R. oryzae* : ----- : -  
*S. cryophilus* : ----- : -  
*S. japonicus* : ----- : -  
*S. pombe* : ----- : -  
*S. punctatus* : ----- : -  
*T. equinum* : -----MHLEF : 5  
*T. rubrum* : -----MAPHAAAGAGTAGDAAQKAVV---EGTLTVAN-VAANRT : 35  
*U. reesii* : -----MAP : 3  
*V. dahliae* : -MSAIACQTAPVGLISRRSFHAKPKLNSAGEAAPVQDAVLEN---KQPISVFDSIRERRA : 57

*N. crassa* : KAGRLIAPTASYADSDMFKGPQ-VGKPKSKSMN-HHLSAELSRRHPCALKQA-----ARH : 110  
*U. maydis* : VANVDPNPYFGDKVGDLASTSETYPKASRVDPA-RFLSQVSHDRPASAIRSL-----FPA : 60  
*A. macrogynus* : VPAPAARTLLGIRMTMTNNKTTTPIAKPIQDYT-KYLTAVSLARQPSAIRAL-----QPI : 70  
*A. nidulans* : -----MASLSPPLDLS-HHFLSLTTKRRAPSAVKDF-----YKY : 32  
*B. cinerea* : KAGKRVAGVAAF-----TSDHFKNPA-DRISLESRSRKPNSLKGKGA-----AKY : 77  
*B. dendrobatidis* : SFSSVASSEKSDSSSLSVSMQLATAKKPITDYT-EYFSPRAAARRPSAIRDL-----ATL : 83  
*C. albicans* : -----MSDPT-HLISKRAAGRTSVHFTNAPSDKPPANF : 32  
*C. guilliermondii* : -----MSEFVHGHLISKRALARKSSHFAAI-DKSPKGF : 33  
*C. immitis* : KT-TMPTGVAASCHSDMFKSLACATKPKAKRWD-KYLSVESKSRKASTLKQA-----AEY : 88  
*C. neoformans* : -----MPSVAAPVKLDYQ-SFLSQEAKGRIRSQLRDL-----RYF : 35  
*C. tropicalis* : -----MPTDPS-HLISKRAASRSSHFTNAPAGEVPIGF : 33  
*F. graminearum* : KAGKLVAGVAAASDSDMFKGPT-TGLPKSKRWD-NHLSHESKVRPECTLKQA-----ARH : 111  
*F. oxysporum* : ----MAPSATDATAQASPAATALQALPPPDKLS-HLFSKVTRNRKPSNIKAF-----YKF : 50  
*M. oryzae* : -----MQLPTRPLSRRQDNGEDDSRPLPRDLS-HYYSQTTKNRKPQVKEF-----YKF : 48  
*P. brasiliensis* : KT-KVPTGVAANSESDMFKSAACFTKPKAKRFE-HLLSAESKSRKGSLLKQA-----AKY : 84  
*P. nodorum* : KALQSQWGIAAASDTANFRQKSYENKPKAKRWD-HILSQEALIRKGNLSLKEA-----AKF : 92  
*P. triticina* : -----MVAVDYDGKFI SRAGKRWQPSGIRGL-----FPL : 30  
*R. oryzae* : -----MDYS-KHISEASKARNPSAIRAL-----MPY : 25  
*S. cryophilus* : -----MSIQPKDLS-HHLSVESASRRPSPLKAI-----AGS : 30  
*S. japonicus* : -----MVAYQPKDLS-HHLSLESSARRPSPLKAA-----ALS : 31  
*S. pombe* : -----MDNLKKKYQ-HHLSLESASREYGFQML-----GRI : 30  
*S. punctatus* : -----MTSEASNPDYS-RFFTVRSAARKPSAIRAL-----QPL : 33  
*T. equinum* : EKAHDVLHEDVRDAVNIRQAHFSAPKRLANRWD-HRLSDESLSQAGSPLKNS-----VKT : 59  
*T. rubrum* : RC-ALPKGVAAFSDSSMFKSAASASQPKAKRWD-RYLTEESKLRKPSLTKQV-----ALY : 88  
*U. reesii* : MPTEPPLPGSHDSDDLNRRRTAEPMLRPPHDFS-RYYS CATRRRVASSVKDF-----YKY : 57  
*V. dahliae* : KAGKLVAGVAAVSDSDMFKKAPS-HDKPEAKRWD-HHLSHEAAVRKPCCTLKQA-----ARF : 110

*N. crassa* : LKNPNI-----ISLGGGLPCAIEYFPPIESITLKVP-----TPPDFSEA : 147  
*U. maydis* : ELIPGM-----LSLLAGKPNPDTFPFESLSLNL : 88  
*A. macrogynus* : MAMPGM-----ISLGGGLPNPATFPPIANVELTL : 98  
*A. nidulans* : FMIPGI-----ANLAGGLPNASYFPDYDTLEASAA-----HPQRFPTI : 69  
*B. cinerea* : L-GPGM-----ISLGGGLPCPDYFPPIEISIKVP-----TVPHFSEA : 113  
*B. dendrobatidis* : VNVPGM-----ISLGGGNPHPSTFPPIASIQYTL : 111  
*C. albicans* : KSHEKP-----LALSYGMPNHGFFPIDSIDVNLVDYPFQKITTPSTTSSTAEPPSSSLN : 88  
*C. guilliermondii* : KPADKN-----LILSWGTPNDGFFPPIESIDLQLVDPFE-----KSLSMSMTNASL : 79  
*C. immitis* : LKNPGL-----ISLGGGLPSPEYFPPIEISIKVP-----VAPNFSEE : 125  
*C. neoformans* : QAIIPGM-----ISFGGGLPHPSTWVNVNAMVLSVPFAKKS-----IFIPGYEST : 78

*C. tropicalis* : KPHNP----LLSYGMPNHGFFPIDSIDVNIVDYPFQ-----TTLDHAKPNGSSTS : 81  
*F. graminearum* : MKKPGL----ISLGGGLPSSEVFPFAELGFKVP-----VAPKFSEK : 148  
*F. oxysporum* : MQIPGI----SNFAGGMPNVKYFPEDTLEAQIS-----NADRWEPS : 87  
*M. oryzae* : FQIPGI----VNFAGGLPNLRFPPDFTLEAQT-----KPERWTPS : 85  
*P. brasiliensis* : LDKPGL----ISLGGGLPSCEYFPFESISIKIP-----TPPHFSEE : 121  
*P. nodorum* : LATPGL----ISLGGGLPSSEYFPFEELSMRVP-----QVGHFSEA : 129  
*P. triticina* : ENRPGM----ISMLAGKPNPATFPFESIAITL----- : 58  
*R. oryzae* : LNRKDM----ISLGAQPNPATFPFASLTTL----- : 53  
*S. cryophilus* : VSKKGI---NVISLAGGLPNPQYFPERKMGSEIP-----SIGSWVRG : 69  
*S. japonicus* : KSKTGI---NIVISLAGGLPHSDYFPBIRTSTAV-----YRPD : 65  
*S. pombe* : QSDSDI---KMLSFAGGEPNPSKFPPIHKLSVSFP-----EVNSWEKD : 69  
*S. punctatus* : LSIIPGMFGLVQISLGGGNPNPTTFPEKELSFTL----- : 66  
*T. equinum* : ATTFVP----IPLGVGRPASLFYPWQSMTMTG----- : 87  
*T. rubrum* : M-GPNV----ISLGGGLPSQEYFPFHEISVKAP-----SPROFADP : 124  
*U. reesii* : FAIPGI----HNLAGGLPHVSYFPFDSLEATVA-----LPNRIPKD : 94  
*V. dahliae* : LKTPGL----ISLGGGLPSSEYFPFSEITMRVP-----TPPDFAEK : 147

*N. crassa* : AT----SQSGAE-----VRIGKYDAT-DPSIQGT--- : 171  
*U. maydis* : -----KPEAEA-----GPTQLNIQ-----G--- : 103  
*A. macrogynus* : -----KNGAKISMG-----D--- : 108  
*A. nidulans* : PGGKKAKGPQTS-----ERIVVPKESRSATS-KK : 97  
*B. cinerea* : QT----KESGTI-----LTAGKYDVS-EG--KGA : 135  
*B. dendrobatidis* : -----KSGEV-----IDIP-----T--- : 121  
*C. albicans* : GSENGHQTKTPP-----SSIHTPQSTVHISRHTTDPKL--- : 121  
*C. guilliermondii* : ESLALSKTNGTV-----ANDSSGPKKITINRRSEDEKL--- : 112  
*C. immitis* : AT----HESGQV-----VTAGKYDIR-EG--RSE : 147  
*C. neoformans* : DPTSL-HPLAPY-----TPPTKLSIATDP--FA--- : 103  
*C. tropicalis* : DKINDLKSSDSE-----NNQHDLSLTIHIERIPKDPKL--- : 114  
*F. graminearum* : DT----EESGQT-----VTIGKYDVR-DR--GGT--- : 170  
*F. oxysporum* : PNYDPKVPDPSTESLSGVSIGYSNSPDKNAPRNPDPYNTSSRISIPKILNEPDI--TKK--- : 143  
*M. oryzae* : ESTATNTDSRSN-----GDSRDRSESTHITVPLVAKETDPLRK : 123  
*P. brasiliensis* : ET----VKTGTV-----VTSKYDIR-NG--KSD--- : 143  
*P. nodorum* : ET----KESGVL-----IKAGKHDLA-DG--KSI--- : 151  
*P. triticina* : -----KPSVAT-----GEVPETLCLS-----G--- : 75  
*R. oryzae* : -----KTGEKIEID-----D--- : 63  
*S. cryophilus* : A----ENEGKL-----SDFSVMDSSEDQDD--- : 90  
*S. japonicus* : GK----PENNNV-----SKIPLQELSLGMEPTEDND--- : 92  
*S. pombe* : TN----KDATVS-----YELS-NNANEGS--- : 88  
*S. punctatus* : -----KDEAGG-----GEIHVE-----S--- : 79  
*T. equinum* : -----TKESNT-----RNPMVCNIG---EAA--- : 105  
*T. rubrum* : AP----ANPECV-----FSSTKHVV-DG--TSE--- : 146  
*U. reesii* : GFVPPQPPTASP-----ASPASQRVVVPKESVDDGLRR : 129  
*V. dahliae* : DNLSAQSPTAQT-----ISIGKYDVR-DG--KSE--- : 173

\*

*N. crassa* : YDLAVALNYAQASGSAQLLRFVTEHTELVDH-----P--PY----SD--WRSCLTIGSTGA : 219  
*U. maydis* : EDLVSALQYGATS GIPKLVQWITELQVHMHKREAVT PGSKLDGVAGRTPWRVTTGNGSQDL : 164  
*A. macrogynus* : TMTRAAALQYGPTP GHPDLVAFFEKLQARVHG----T--PYANKQLE--RKILVGNCSQDL : 160  
*A. nidulans* : IDITLALQYGTSE GLPPLATFVNQFVREHLH----PNIPIYA--GG--PGTLLTTGATDG : 148  
*B. cinerea* : YDLISIALNYGQGS GSAQMLRWVTEHTEIVCN-----P--PY----AD--WGCSLTVGSTSA : 183  
*B. dendrobatidis* : EOVKQALQYSATP GLEKFVWELKKFQVHEHGRD--P-----LE--FDVCIGNCSQDL : 169  
*C. albicans* : IDLARGLOYAAVE GHAPLLQFARDFIIRTHK----P--NY----DD--WNVFITTGASDG : 169  
*C. guilliermondii* : IDIAHGLQYSEPK GHPQILQFTREFISKIHP-----P--KY----SD--WDTIVTTGASDG : 160  
*C. immitis* : YDLISIALNYGQSV GAAQLLRFVTEHTEIVHN-----P--PY----SD--WHCSLTAASTAS : 195  
*C. neoformans* : PDLARDLQYSSNF GLPYFVDWLTQHVKRIHD-----P--PY----PEDRWQVLATAGNIDA : 153  
*C. tropicalis* : MGLKSGLOYAAVE GHQQLLQFTKDFIQRTHN-----P--NY----DN--WTSFITNGASDG : 162  
*F. graminearum* : YDLISIALCNYGQAT GSPQMMRYLTHEITEIVYK----P--PY----AD--KWVCQITIGSTGA : 218  
*F. oxysporum* : YDLATALQYGQVT GYPPLHSFIRQFTNQVLH----PSVPPYQ--GG--ADVILNNGGTDG : 194  
*M. oryzae* : IDLATALQYGMAD GYPPLLSFVRQFTREHLH----PDVPPYR--SG--PEVVLTVGSTDG : 174  
*P. brasiliensis* : LDLEISLNYGQSN GAAPMMRFVTEHTEIVHN-----P--PY----SD--WQCSLTAGSTSS : 191  
*P. nodorum* : FDIATAFNYGQAG GSAQLLRWMTHEHTELVDH-----P--PY----ED--WRCCMSIGSTSA : 199  
*P. triticina* : REIDAAALQYGPAT GQEEFLNWVYQLQQRCHC----RGTP-----EEEGWSCAIGAGSQEL : 126  
*R. oryzae* : QLFDRSLSDYLT GQPLLNQWLTELQKIEHA-----P--P-----VD--FDVSIIGCSQDL : 110  
*S. cryophilus* : LPLSVALQYKGS GCAQLTSFLKEHTQMIHS-----P--PY----AN--WDILLTTGNTQG : 138  
*S. japonicus* : FGLSQGLQYGGF GALQLAAFVKEHTRIVHQ-----P--KY----EG--WDVMLTAGNTNA : 140  
*S. pombe* : LDLLGALQYGCQ GIPELVFKIKDHVQIHM-----P--QY----KD--WDIKITNGNTIG : 136  
*S. punctatus* : GDLQKALQYSPNT GIPFVAWLKELQTSSEHS-----P--LY----DS--FDVCVGNCSQDV : 127  
*T. equinum* : FDLSSALNYADPS GSTELVACFRENTRLIHN-----P--PY----QD--WDTTLTTCGSTSA : 153  
*T. rubrum* : FDLLEVALNYGQSV GYAALVRWITEHVEIVHN-----P--PY----GD--WEITMAPGSTQG : 194  
*U. reesii* : IDLATALQYCAVD GYPPLRSFIRQFVRENH-----PHVPPYE--GG--PEVILTCCGATDG : 180

V. dahliae : YDLSIALNYGQSTCSAQMRFVTEHTELVYN-----P--PY-----AD--WKVCQTVGSTGA : 221

N. crassa : LEQTLRMLCDGPGRRD-----SLTTEEYSFSTALETAGPL---DLKVVGVKMGK---- : 263  
U. maydis : LNKTFDALL---NPGD-----VILVESPAYTGILPSLVMI---KANIVPVTS---- : 205  
A. macrogynus : LAKAINALV---APGD-----TLIVESPACYVGTLAAILKPMVKAQGKVLAEVPT---- : 205  
A. nidulans : FSKAIEAFTETWNPDR-DGIHLRQGILCEEFVYMNAIQTVKPR---GLNIVPVAI--- : 199  
B. cinerea : LEQTYRIFC---ERGD-----FVLSEEYTFASAVETAAPL---GVKFLGVKMGK---- : 224  
B. dendrobatidis : LTKAIDAFV---TDGG-----SVMMECPAYVGMIAAYVRPT---GANIVEIPS---- : 210  
C. albicans : LNKAADVFL---DDGD-----VILVEEFTFSPFLRFSDNA---GAKAVPVKINFD-- : 213  
C. guilliermondii : LNKVADALL---DPGD-----VILIEEFTTTPFLAHVANT---GGIPVPMRMNLDPT : 206  
C. immitis : WDMVLRFLC---NRGD-----YILTEEFTFSSAMETALPQ---GIRLAPVKMGK---- : 236  
C. neoformans : SDGVVRTLC---SPGD-----SMLLEEFAPGSLTHYKSL---GINCVGVPMGK---- : 194  
C. tropicalis : LNKACDALL---DPGD-----VILVEEFTFSPFLRFSNS---GAIAISVRLNLN-- : 206  
F. graminearum : LEEALRMFC DK-DRGD-----SVLTEDFSFSTALETVGPL---GIKAFGVSI---- : 261  
F. oxysporum : FSKVLQLLVDPWYEG-LHPVVERPGLCEFTFVFGNILTQARPL---GVNVVPEI---- : 245  
M. oryzae : FAKTLELFVDPWSECKGDDVDRPGLLCERFAYGNVLTQARPK---GVQVVTVEA---- : 226  
P. brasiliensis : WDMALRMFC---ERGD-----YILAEYTFATALEAASAL---GVRAAAVKMGK---- : 232  
P. nodorum : LDMALRMFA---RPGD-----VVLSEEYTFSAFVETARPM---GVRVCGIPL--- : 240  
P. triticina : MEKAFAAVC---DPED-----TILMETPVYSGTLGFLQPS---GRTLIEIES---- : 167  
R. oryzae : LTKALEMMI---NPGD-----AVMVEEPTYTGALAFLETM---PCTLAHIAT---- : 151  
S. cryophilus : LDMCLRMLM---NRGD-----SILVEKYTFPSALQAMRPM---GLNAVSVDM---- : 179  
S. japonicus : LDTCLRMLL---NRGE-----SLIVEEYTFPSALQTIEM---GINCIPMPM---- : 181  
S. pombe : LEYCLRLLV---NRGD-----CILIIEKYTYPAAITAMRPL---GVKFIPIIDM--- : 177  
S. punctatus : LTKAFEMLL---AEGD-----NLLIEESPAYVGS LAFLKPL---GCKFVEVPV--- : 168  
T. equinum : IDIVLRMLC---NRGD-----WILAEASTYTGVMATKAH---GLNIQSIEM---- : 194  
T. rubrum : WDFVLRMLC---KPGD-----MILTTEEYTFCSAMEGAAQ---GVTPFPVKV--- : 235  
U. reesii : FSKTIEAFTNVWDENR-DWIRERQGLLCEEFAYMTAIQTARPR---GLNIVPVAV--- : 231  
V. dahliae : LEQALRMLCDR-DRGD-----SVLTTEEYSFSTALETIGPL---GIKTFGVKMGK---- : 264

N. crassa : --DGGGLPE---AMDELLSNWNPPEEREG---RRKPHVLYTVPSGONPTGTQGLERRKQV : 316  
U. maydis : --DDQGMSS---RLAEILANWETDPQTAS---LARPKCLYTTPTGANPAGTTASDERKRQI : 259  
A. macrogynus : --DAHGLIPD---ALDKILADWPAT-----SPKPRVLYTVPTGGNPTGNMAPIERRRAI : 254  
A. nidulans : --DDEGMLPYGPGGLAEVLGNWNRHK-----GCRPHLMYTIITIGONPTGGTILSVERRKQI : 252  
B. cinerea : --DAEGLPE---ALDEILSNWDEQAR-G---ARKPFVLYTVPSGONPTGATQGIERRHAI : 276  
B. dendrobatidis : --DADGLNPD---AMEKTLANWPDV-----KTRPKILYTVPTAGNPTGVTISLARKKRV : 259  
C. albicans : --NDSGDIDL---QFVDLLENWKEHYP-N---LPPKALYTIATGONPTGFTQSLEFRKKI : 266  
C. guilliermondii : PDKSNGLDID---YLTDLLENWETKKP-D---LKKPKALYSIPTGONPTGLTQSLEFRKKV : 260  
C. immitis : --DEQGLPS---SLDEVLTNWDASAR-G---ARKPFVLYTVPSGONPTGATQDVERRKEV : 288  
C. neoformans : --DGEGLVPS---ALEKILAEWNEEAR-G---GPKPKAILIVPTCSNPSGITPTPRKNEI : 246  
C. tropicalis : --KESDGLDLD---HLVGLLENWKEEHP-E---LPPKALYTIATGHNPTGFTQSLEFRKKV : 259  
F. graminearum : --DEQGLIPE---AMDELLSNWDAKER-G---SRKPHLLYTVPSGONPTGATQGTERRKAI : 313  
F. oxysporum : --DEEGMIVEGSGGLREVLNWNPNQ-----GRLPHFLYTVTMGNPTSGVVGVRKKEI : 298  
M. oryzae : --DSGMLADPGGLEDVLANWDDSK-----GRRPHLLYTVTMGNPTGIVLDVERRKAL : 279  
P. brasiliensis : --DDQGLPE---SLDEVMTNWDAAAR-G---ARKPHLLYIVPSGONPTGTTGHPERRKEI : 284  
P. nodorum : --DAEGLIPE---QLDNILSTWVNVNVR-G---ARRPHLLYTVPTGONPTGATQSAERRRAL : 292  
P. triticina : --DHHGISAV---ELERVLNWHSDPATSS---LKFPKVVYSIPTGSNPTGCSAPLERKRLI : 221  
R. oryzae : --DEFGLVPE---SLENMLAHWPESNPSGKKDQPRPHVLYTIPSGONPTGISATYERKQAV : 207  
S. cryophilus : --DKNGLPE---SLEILNNWK-----G---GNKPRVLYTIPSGONPTGSLSVERRKEI : 227  
S. japonicus : --DLNGILPE---KLEELLSSWNTKAR-G---GPKPHVMYVIVPSGONPTGSTLSNERRARI : 233  
S. pombe : --DENGLPE---SFEKVMETWSSSL-----GARPHVLYTIPTGONPTGSTLTLERRKFF : 227  
S. punctatus : --DKDGLSD---KLEILSGWKDV-----RTRPKVLYTVVGGNPTGVSTSVERRKRI : 217  
T. equinum : --DEEGLLV---DLDNKLRHWDTLR-----SRKPFVLYTIPSGHNPTGVTQSTARKAAL : 244  
T. rubrum : --DAEGLLAT---SLDEILTNDPAAHGG---ARKPIVLYTVPSGONPTGATQSAERRREV : 288  
U. reesii : --DSQGMKVEGERGLADVLDNWDNDFSR-----GQRPHLMYTVTIGONPTGAVLPLERRRQI : 284  
V. dahliae : --DAEGLPE---SMDELLTSWDEKAR-G---ARKPHVLYTVPSGONPTGATQGPERRRAV : 316

N. crassa : VEVARKHDLFVIEDEPYYLQMLPL---EESKETESEET-----VESEMSS- : 359  
U. maydis : LALARQYDFVLVEDDPYYLH-----FEGLDQDAVTRP----- : 292  
A. macrogynus : VALAQKHDLVMLEDDPYYLQFALPPTDAATQQLTTPAD-----QTTDVALGDRYASA- : 307  
A. nidulans : YAICQKYDVIIVEDDPYWNLOYPSAQELQARHRNSSVNPALSERNYNAGRKSSGYKFLDS- : 312  
B. cinerea : YKVAQKHDLYIIEDEPYFLQMPQ---YTGPDAPDVPPP-----ANNDEFLKA- : 321

B.dendrobatidis : YEVARKYNVVMEDDPYFLOF-----GEKRD--- : 286  
 C.albicans : YDLAVKYDFAIIEDDPYGYLTLPK---YEKPNIGGSGSG---NNELKNDLEIDDYLKNH : 319  
 C.guilliermondii : YALAEKHDFTIIEEDDPYGYLTLPP---YSKPEGVLKLDSE-----FLTVEEYLSNH : 307  
 C.immitis : YKVAQKHDIIIVDEDPYFLOMQP---YKGANAPQDPPP-----ANYNEFLKA- : 333  
 C.neoformans : MAICRWNLIIIEDDPYCYLQVRP---NGADTP----- : 276  
 C.tropicalis : YALAEKYDFAIIEDDPYGYLTLPT---YTKPDLTKNPTR-----NKSDITVDDYLKNH : 309  
 F.graminearum : YAVAQKHDIIYIIEDEPYFLOMQP---YTGRNQPDVPPP-----KTVDEFVSS- : 358  
 F.oxysporum : YALASKYDIIIVDEDPYWYLFQPSAAIHEAKARGYAIPQ---VADSHKTVKSSGYDFIDS : 355  
 M.oryzae : YAICSKYDVLIVDEDPYWYMFPSAAREEAKSRNLPPPQ---VTSTYSRSTGYPFLLDS- : 334  
 P.brasiliensis : YKVAQKHDIFIVDEDPYFLOMQP---YKGVDTPPDAPP-----ASYEAFIKS- : 329  
 P.nodorum : YAVCQKHDIIYIIEDEPYFLOMQP---YTGNAPVPPPP-----SSHDEFLLNS- : 337  
 P.triticina : LELVRKYDLLLLEDDAYYFLHFDR-----KN- : 247  
 R.oryzae : YKICKSKYDVIIIEDDAYYYLOY-----GEKRT--- : 234  
 S.cryophilus : YALAQKHDFTIIEDEPYFLOMQP---YQKPEAVDPKF-----TNEEFVNN- : 271  
 S.japonicus : YEICQAHDIIEDEDPYFLOMDN---FDG-KIPEEQPT-----VSNTEFLSQ- : 277  
 S.pombe : LTLAKKYDIIIVDEDPYFLOMEK---YDANWKPKDQAF-----NISSEKFKK- : 271  
 S.punctatus : YEIAKRYDIIIEDEDPYFLOF-----GDKRA--- : 244  
 T.equinum : YQVAERHDLIIIEDDPYFFLRNG---SFS-SLDINPPY-----SSFELRKS- : 288  
 T.rubrum : YKVAQKHDIIIVDEDPYFLOMEP---YTGLNTPPPPP-----ATTDEFLLKT- : 333  
 U.reesii : YKLCQRYDIIIEDEDPYWHLOYPSAKQNALRQGSQSDSSP---HTPFVSHDEPSGFPFLDS- : 341  
 V.dahliae : YAVCQKHDVYIIEDEPYFLOMQP---YAGKDAPVPPPP-----ASVDQELAD- : 361

N.crassa : LIPSLLSLDVD-----GRVLRMDSFSKVVVPGSRVGVVTAENIIEQYLRAEVCNCGA : 413  
 U.maydis : RCRSYWSLEEEHRERWGTGRVIRFESFSKILAAGLRLGFATGPNEILDVAVDANTAMSNLQF : 353  
 A.macrogynus : LVPSYTSLDTD-----ARVIRFESLSKVISAGLRVGLCTGPAPLVDRIALDIQATSLQF : 361  
 A.nidulans : LVPSYLSIDMD-----GRVVRLDTFSKTIAPGCRLGWITAQPAFIERLARIAESSTQAF : 366  
 B.cinerea : LIPTYLSIDTD-----GRVMRMDSFASKVIAPGTRVGVITASEQIVERFIRSNENSNQNP : 375  
 B.dendrobatidis : --PSYFSFDVD-----GRVLRFDLSLKVLSGGARIGVWVSGPKMLVERIILHSMGNSLHP : 338  
 C.albicans : LTPSYLELDTT-----GRVLRVETFSKLFAPGLRLLGFIVGHKEVIDAVKNYSDDVNRGA : 373  
 C.guilliermondii : LVPSYLTLDTT-----GRVVRLETFSKLFAPGLRVGVFVGHKKVTEVIGYAAVVTRAF : 361  
 C.immitis : LIPSFLSMDVD-----GRVVRLESFSKVLSPGSRVGVWLVASEQIVERFLRNAETCTQNP : 387  
 C.neoformans : LIPSFLSLDVD-----GRVVRLDTSFKFIAPGSRCGWITGPKELVTAVMVKAELASSNGP : 330  
 C.tropicalis : LTPSYLELDTT-----GRVIRVETFSKLFAPGLRLLGFVIAHVKIIIEAIIKYNSEVINRGA : 363  
 F.graminearum : LIPSLLSIDVD-----GRVMRMDSFASKVLVPGSRLGWITASEQIVERYIRHAEVASQGF : 412  
 F.oxysporum : LVPSYLSIDVD-----GRVIRLDTFSKTVAPGSRLLGYATAQPAIIFERLTRIAETSTQGF : 409  
 M.oryzae : LVPSFLSFDVD-----GRVVRLDTFSKTVAPGSRLLGWLTGHPLFMERALRQNEVNIQSA : 388  
 P.brasiliensis : LIPSYLSIDVD-----GRVLRLESFSKVISPGSRMGWIVGTAEIVERYTRHSEVSTQNP : 383  
 P.nodorum : LVPSYLSMDVD-----GRVMRLDTSFKVVSPGARIGVWTACAEIVEKYTKHADVSTQNP : 391  
 P.triticina : RAPSIFALEKSEGGQ--TGRVVRFDLSLKIISGIRLGFVTGPARILEIINLHTSNTNLQF : 306  
 R.oryzae : --PSYLSLDVD-----GRVLRCDMSKILSSGLRIGVWVSGPQPLIERMNHTMVNTNLQF : 286  
 S.cryophilus : LITSFLHIDVD-----GRVIRMDLSKVVVAPGSRVGVITAOPLFIERSLRYTETASQNA : 325  
 S.japonicus : LITSFLSIDTE-----GRVIRLDMSKVVVAPGSRLLGWLTGHPLFMERALRQNEVNIQSA : 331  
 S.pombe : LIPSLHLHLDTD-----GRVLRVDSFSKLVIPGLRLLGWITGNSLFIDRITRYAEVCTESE : 325  
 S.punctatus : --ATVFSMDAD-----KRVLRFDLSLKFISAGMRIGVWTGPKPLVDRIVLHGQATMLHP : 296  
 T.equinum : LPSYLSLDKS-----GRVIRVDSTSKILAPGLRCGWLTASKQIVEIFENFAEVGPAPP : 342  
 T.rubrum : LIPSYLSMDTD-----GRVIRLDTSFKVISPGSRVSVFLVSSAQFTEIRIRQAETSTQAF : 387  
 U.reesii : LVKSYLSIDTA-----GRVVRLDTFSKTIAPGCRLLGWLTGHPDIIVERILRISETSTQGF : 395  
 V.dahliae : LVPSLLSMDTD-----GRVLRMDSFSKVLVPGSRLGWITASAQMVERIIRHAEVANQGF : 415

N.crassa : NGISQVILYKLL-----DEQW--GHE--GYFK--WLMNLRQEYTKR : 448  
 U.maydis : SCLAGVVAYTLL-----NYW--GIP--GFLR--HVDNVARYYAKR : 387  
 A.macrogynus : TGLSQAVILALA-----QHSWHGVPAFLA--HAARVAIFYRSR : 398  
 A.nidulans : SGFVQAMVAELILGQQVDDGSAD-----SAKSKDTERAW--KMD--GWVR--WLEGLRAGEYQR : 419  
 B.cinerea : SGISQMVLYKLL-----DESW--GHG--GYLQ--WLINLRLEYTKR : 410  
 B.dendrobatidis : SGISQIMMYSLL-----EKW--GIE--GFLE--HNRKVAIFYKEK : 372  
 C.albicans : SGLTQITIVNNVI-----QENFKGVD--GWLE--WILKMRLNYSYR : 409  
 C.guilliermondii : SGLSQMVLNNVI-----EQKYKGVY--GWLQ--WILKMRLTYTHR : 397  
 C.immitis : SGMSQIILFKLL-----DEAW--GHE--KYLQ--WLVIHRMAYTNR : 422  
 C.neoformans : SGFAVASISAVI-----KAWGGE--GLERDYLPHISDYSKR : 366  
 C.tropicalis : SGLTQITIVNNVI-----QDNFKGVE--GWLE--WILKMRSNYAYR : 399  
 F.graminearum : SGFSQVILYKLL-----DETW--GHE--GYLR--WLMNLRLEYTKK : 447  
 F.oxysporum : SGFVQALIAQAILGPHSS--TLETFS--PESEKPSFTGW--QLD--GWVR--WLEGLRGEYERR : 465  
 M.oryzae : SGFVQSMIGELVMSSQPTETKTTFLGLRTHKDRTAFTGW--QMD--GWVR--WLEGLRGEYEDR : 446  
 P.brasiliensis : SGMSQIILFKLL-----DESW--GHA--GYFD--WLINLRMEYTR : 418  
 P.nodorum : SGMSQIILFKLL-----EDHW--GHA--GYLD--WLIHIRMOYTKR : 426  
 P.triticina : SVTQAITGKLL-----CHW--GFD--RFEA--HCDQVSKFYSDK : 340

*R.oryzae* : **SGV****SQV****MAYQ****LL**-----**ANW**-**GHQ**-**GFFE**-**HVKRVADFY****KEK** : 320  
*S.cryophilus* : **SGISQ****AM****LHALF**-----**KTW**-**GHD**-**GYLA**-**WLKHIRYS****YTER** : 359  
*S.japonicus* : **SGLS****QV****LHGIL**-----**HTW**-**GQE**-**GYLE**-**WLKQIRFOY****TRR** : 365  
*S.pombe* : **SGVSQ****VV****LYAIL**-----**NRW**-**GQN**-**GFLF**-**WLQDLQNSY****TMR** : 359  
*S.punctatus* : **SGLS****Q****M****LAYQ****LL**-----**KKW**-**GRD**-**GFLK**-**HTRSVAGFY****EQK** : 330  
*T.equinum* : **SGPSQ****V****M****LKLF**-----**VESW**-**GQE**-**GFAN**-**WVNHL****S****G****EY****RSR** : 377  
*T.rubrum* : **SGMAQ****I****I****LKLL**-----**DESW**-**GHE**-**GYLK**-**WLIHIRIEY****TKR** : 422  
*U.reesii* : **SGFVQ****S****M****VAK****L****IM****G****D****Q****A****D****D****M****V****K****K**----**PC**--**TEG****S****P****G****W**-**RVD**-**GWVR**-**WLEGL****R****G****G****Y****E****K****R** : 446  
*V.dahliae* : **SGFSQ****V****M****L****W****K****LL**-----**DETW**-**GHE**-**GYLK**-**WLIDLR****M****N****Y****T****R****R** : 450

*N.crassa* : **RDTM****V****T****A****E**--**KFLP**-----**K**-**EVVSW****T****V****P****V****A****G****M****F****Y****W****L****K****I****D****H****S****Q** : 484  
*U.maydis* : **RDN****F****E****A****K****A****N**--**KVLG**-----**AAGVA****Q****W****V****T****P****V****A****G****M****F****L****W****L****R****L****N****L****P****P** : 424  
*A.macrogynus* : **RDAL****L****K****A****M****S****A****R****L****V****E**-----**D**-**GLVEM****S****V****P****Q****A****G****M****F****L****W****L****K****L**---- : 432  
*A.nidulans* : **MQQM****C****S****G****L****E****E****G****K****Y****I****A****L****H****T****R****S****D****E****F****S****L****S****G****N****E****E****D****S****W****E****V****L****E****K****V****Q****M****D****F****A****W****P****T****G****G****M****F****V****V****K****V****N****Y****E****S** : 480  
*B.cinerea* : **RNV****L****A****A****C****E**--**KYLP**-----**K**-**DIVS****W****N****P****P****S****A****G****M****F****L****W****L****S****V****D****W****H****K** : 446  
*B.dendrobatidis* : **CDAF****M****S****S****A****K**--**RHLD**-----**GIAEF****V****A****P****K****A****G****M****F****V****M****K****L**---- : 403  
*C.albicans* : **KDLL****L****Y****S****I****F****E****S****Q****A****Y****K**-----**K**-**GYVD****V****I****D****P****K****A****G****M****F****V****T****F****K****I****N****L****P****K** : 447  
*C.guilliermondii* : **RDVL****V****N****A****I****E****E****S****D****A****Y****K**-----**K**-**NYV****S****I****I****D****P****R****A****G****M****F****L****S****L****V****V****N****F****P****P** : 435  
*C.immitis* : **RNV****M****L****A****C****E**--**KYLP**-----**T**-**SVAS****W****H****P****A****A****G****M****F****H****W****I****K****V****D****W****K****K** : 458  
*C.neoformans* : **SNLM****V****S****L****I****R**--**KYVP**-----**VEAA****E****C****P****D****G****S****G****M****F****L****W****V****R****L****R****V****E****S** : 402  
*C.tropicalis* : **KDLL****L****Y****S****I****F****E****S****E****A****Y****K**-----**K**-**GYVD****V****I****D****P****K****A****G****M****F****V****T****F****L****I****N****L****P****P** : 437  
*F.graminearum* : **RDAL****L****A****C****E**--**DHLP**-----**S**-**DLAS****W****T****P****P****V****A****G****M****F****M****I****N****I****D****Y****T****K** : 483  
*F.oxysporum* : **MTRM****C****S****I****L****E****E****N****A****F****S****L**-**RQ****S****T****S****Q****N****P**----**DLD****W****D****V****I****S****K****I****R****L****F****D****W****P****R****G****M****F****V****V****R****V****H****F****E****K** : 520  
*M.oryzae* : **MNRV****C****R****I****L****D****D****G****K****Y****Q****L**-**KQ****G****T****P****V****P****G****S****H****P****L****D****A****D****W****G****V****I****T****K****K****L****F****E****F****D****W****P****R****G****M****F****V****L****R****V****F****F****E****S** : 506  
*P.brasiliensis* : **RNTM****L****D****A****C****E**--**KYLP**-----**K**-**SIAS****W****N****P****P****A****A****G****M****F****H****W****I****K****V****D****W****K****R** : 454  
*P.nodorum* : **RDVI****L****Q****A****C****T**--**KYLP**-----**T**-**EVMS****W****K****P****P****M****A****G****M****F****H****W****M****Q****I****D****F****K****K** : 462  
*P.triticina* : **LEV****V****N****A****A****K**----- : 349  
*R.oryzae* : **RDDF****V****E****C****L****D**--**KHMT**-----**GRAV****W****T****V****P****N****A****G****M****F****V****W****L****R****L**---- : 351  
*S.cryophilus* : **RNAL****L****Y****A****M****D**--**KHLP**-----**K**-**SICS****Y****I****A****P****E****A****G****M****F****I****W****F****E****V****D****K****S****A** : 395  
*S.japonicus* : **RNAL****L****L****A****M****N**--**KYLP**-----**E**-**GLCS****Y****I****A****P****E****A****G****M****F****I****W****F****E****V****D****R****S****R** : 401  
*S.pombe* : **RNAL****L****L****A****D**--**KHLP**-----**K**-**SVCK****Y****H****S****P****K****A****G****L****F****L****W****V****E****L****D****K****N****R** : 395  
*S.punctatus* : **RDLF****L****Q****S****A****S**--**KRLQ**-----**GVAE****W****T****V****P****D****A****G****M****F****V****W****L****K****L**---- : 361  
*T.equinum* : **RDIM****I****A****A****C****S**--**QHLP**-----**K**-**GLCT****W****T****T****T****P****T****H****C****M****F****L****W****I****T****I****D****L****L****R** : 413  
*T.rubrum* : **RNCI****M****D****A****C****E**--**EFLP**-----**K**-**AVAS****C****N****P****P****T****A****G****M****F****N****W****M****R****V****D****W****K****K** : 458  
*U.reesii* : **MQTM****C****T****I****L****E****E****G****R****F****S****I****V****Q**--**GD****A****L****S****N****D****S****N****L****D****E****W****Q****V****D****N****V****Q****M****F****D****W****P****G****A****G****M****F****V****V****K****F****C****L****E****T** : 504  
*V.dahliae* : **RNML****L****A****A****C****E**--**DHLP**-----**K**-**DIVS****W****T****P****P****A****A****G****M****F****L****W****L****K****V****D****H****T****K** : 486

*N.crassa* : **HPGI****Q****A**-----**GKG****I****L****E****V****E****E****E****I****F****N****S****C****I****A****R****G****V****L****V****A****R****G****S****W****F****R**----**AE**-**Q**-**DTEP** : 526  
*U.maydis* : **TGQ**-----**GE****S****E****G****D****S****F****A****L****I****S****D****K****A****K****A****A****G****V****L****A****V****P****G****V****A****F****I**----**PD**----**GS** : 460  
*A.macrogynus* : -----**KT****V****D****D****A****S****A****L****V****K****G****Y****A****T****D****R****K****V****L****L****L****P****G****I****E****F****L**----**PN**--**AQ****P****G****E** : 467  
*A.nidulans* : **HPLR****Q****I**-----**YGP****E****R****L****S****K****A****L****W****V****H****F****T****Q****K****P****Q****L****C****L****L****G****P****G****T****I****F****S**----**PT**-**DEV****Q****A****R** : 524  
*B.cinerea* : **HPA****A****K****T**-----**KPI****A****D****I****E****Q****E****I****F****L****S****G****I****D****Q****G****V****L****I****C****P****G****S****W****F****T**----**AE**-**KD****G****F****V****P** : 488  
*B.dendrobatidis* : -----**I****G****I****D****D****S****T****D****L****I****K****R****K****A****L****E****K****K****V****L****L****V****P****G****I****E****F****L**----**PN**----**AR** : 435  
*C.albicans* : -----**D****V****D****V****L****Q****M****K****L****L****L****W****K****L****I****S****Y****G****I****L****V****V****P****G****Y****N****M****T**----**VD**-**LE****F****S****K****D** : 484  
*C.guilliermondii* : -----**GT****P****I****I****E****K****I****R****L****L****N****W****K****L****L****A****F****G****V****H****A****V****P****G****I****N****M****A**----**TD**-**S****E****F****S****K****E** : 472  
*C.immitis* : **HPLA****L****A**-----**G****V****S****Y****D****S****I****E****E****A****I****F****K****A****A****V****G****E****G****V****L****S****R****G****S****W****F****F**----**AD**-**K**-**S****T****E****P** : 500  
*C.neoformans* : **HPQL****S****T**-----**L****S****P****E****E****I****S****D****K****V****F****H****T****L****I****G****E****K****V****M****V****A****P****S****S****Y****F****K****T****P****G****G****P****V****W****S****K****D****E****E****S** : 449  
*C.tropicalis* : -----**D****V****D****V****L****A****K****M****K****L****L****L****W****K****L****I****S****Y****G****V****S****V****P****G****Y****N****M****T**----**VD**-**Q****E****Y****S****K****A** : 474  
*F.graminearum* : **HPD****A****G****K**-----**R****S****I****V****D****I****E****E****E****I****F****N****L****C****I****E****N****G****V****L****I****A****R****G****S****W****F****L**----**TE**-**K**-**D****K****A****P** : 524  
*F.oxysporum* : **HPLY****Q****T**----**R****G****D****I****A****P****V****I****D****G****T****A****L****A****N****A****F****L****I****H****S****T****H****A****P****H****L****V****L****G****S****P****G****S****M****F****S**----**AT****P****E****I****R****E****K****R** : 573  
*M.oryzae* : **HPLW****K****A****P****R****P****G****K****D****G****E****P****A****G****V****M****D****G****G****V****L****S****G****A****L****L****A****M****L****T****K****K****P****W****L****V****L****V****A****P****G****F****M****F****S**----**AN****E****E****I****Q****R****K****D** : 563  
*P.brasiliensis* : **HPG****V****R****E**-----**G****K****D****H****A****A****I****E****N****A****I****F****K****A****T****I****E****E****G****A****L****V****S****A****G****S****W****F****V**----**AD**-**S**-**S****I****P****Q** : 496  
*P.nodorum* : **HPQ****Y****P****E**-----**K****S****I****E****E****E****E****S****I****F****Y****R****N****I****E****H****G****T****M****C****M****R****G****S****W****F****Y**----**AD**-**A**-**D****E****E****H** : 503  
*P.triticina* : ----- : 351  
*R.oryzae* : -----**L****G****G****I****T****D****S****Y****D****L****V****M****T****K****V****L****K****E****N****V****L****A****I****P****G****L****A****F****M**----**PR**----**GN** : 384  
*S.cryophilus* : **YKF****A****D****Q**-----**G****K****S****I****A****E****I****E****S****D****I****H****E****E****A****I****Q****D****C****A****N****V****A****C****N****W****F****V**----**VD**----**SS****I****N** : 436  
*S.japonicus* : **YLH****S****D****K**-----**F****K****T****V****P****E****I****E****T****D****I****H****E****Q****A****V****D****A****G****V****N****L****A****C****H****W****F****I**----**VD**----**SS****K****N** : 442  
*S.pombe* : **LICS****N****M**-----**D****K****S****I****S****E****I****E****M****E****I****F****V****E****L****V****N****N****G****V****K****P****V****C****G****Q****L****F****M**----**GE**----**P****N****S****A** : 436  
*S.punctatus* : -----**L****G****I****T****D****S****S****D****L****I****Q****K****A****M****E****K****K****V****L****L****V****P****G****F****E****F****F**----**PN**----**P****T** : 393  
*T.equinum* : **HPD****Y****L****E**-----**K****R****T****H****L****S****L****D****L****E****D****K****I****Y****E****R****A****A****S****H****G****V****A****V****A****K****G****S****W****F****N**----**VE**----**T****C****L** : 455  
*T.rubrum* : **HPAY****Q****Q**-----**G****K****D****H****K****A****I****E****E****M****I****F****L****A****A****V****D****A****G****V****L****S****R****G****S****W****F****L**----**AD**-**Q**-**S****A****T****E** : 500  
*U.reesii* : **HPL****W****S****Q**-----**V****P****A****A****K****L****A****N****A****L****W****K****Y****L****I****N****A****P****Y****R****V****I****V****G****P****G****W****L****F****A**----**PT**-**E****D****V****K****K****Y** : 548  
*V.dahliae* : **HPD****Y****P****Q**-----**R****S****L****L****D****I****E****E****D****I****F****N****K****A****I****G****N****G****V****L****C****A****R****G****S****W****F****R**----**TE**-**P**-**G****T****P****A** : 527

*N. crassa* : NELFFRATFAAAT-AENMTEAIRRFGEAIRESEFKL----- : 560  
*U. maydis* : KSCYVRTSFSIIA-EDDVEEAFNRLRNVLDAWKDAGKPMPELA----- : 503  
*A. macrogynus* : PCAFFVRATYSTAT-DEQMOEGMKRLRECIDLAMRDQOKQKQAPKK----- : 512  
*A. nidulans* : GHQYFRLCFAAMP-ADDVVPITQRVVDGFRSFWQRKNLDGLEDDGIAQTMEQLQMEPSAN : 584  
*B. cinerea* : VDMFFRATFAAAS-EEKMTAIERFGVAVRNSFGIE----- : 523  
*B. dendrobatidis* : ATPYVRASYSLAT-KEDIDLALQRLRELVLLEARDKK----- : 470  
*C. albicans* : RSNFFRLCYALANNDDEEILESGKRLTDVAYEFFSNGLEF----- : 523  
*C. guilliermondii* : TANFFRLTVAAANTDEELIAAGTQLAKAVTEFFENGLEF----- : 511  
*C. immitis* : TDMFFRATFAAAP-ADKIQQAIRKFGDTLRAQFQLQ----- : 535  
*C. neoformans* : KRIFVRLSESFST-ADEMEEGVKRFARGLRKEWGIQNLDEVEH----- : 491  
*C. tropicalis* : RSNFFRLCVAIANNEDEEILESGKRLTDGVLEFFNNGLEY----- : 513  
*F. graminearum* : PGLFFRATYASAT-PENMNKAIERFGKAVRDSFGRK----- : 559  
*F. oxysporum* : GWQYIRLCFAAES-DENIDGGASRFARSVGEFFKINDTAQIEKLLLEELPS----- : 622  
*M. oryzae* : GWAYFRLCFAAEA-EEAVDPCTQRFDVGIQRFWKIKTVREIEDLLKGFPISSGEASSMVA : 623  
*P. brasiliensis* : TDMFFRATYAAP-GDKIEEAIRRIGVALRSEFKLD----- : 531  
*P. nodorum* : DTLFFRATYAASP-EDKMEEGIRRLGESVREEFGLGKK----- : 540  
*P. triticina* : ----- : -  
*R. oryzae* : KNEYIRVVSFNVN-KPQMDALRRLAMVIDKEAEIHNVKI----- : 423  
*S. cryophilus* : DKIFFRVTFAAYAE-LPEFETAIERFANVLKFFKS----- : 470  
*S. japonicus* : DRVFFRVTFAAAN-FEDFNVAIERFAAVLNKNFK----- : 475  
*S. pombe* : DKIFFRFAYSLLAD-LSTFEAGLERFTSTIQKYFQL----- : 470  
*S. punctatus* : TTPYVRASYSLAE-AEDMDEALRRLRELVEEARS----- : 426  
*T. equinum* : DKVFFRITFVSTTCLDDLENGVKRLGAAVRDEFRLAQA----- : 493  
*T. rubrum* : EDMFFRSTFAAAP-ADKIREAIRRFGEVLKAQFNI----- : 534  
*U. reesii* : AWRYMRLCFAPVD-EGAVATSSHNFIEGCRSFWQVKDIHDIDDLEDDNEE----- : 597  
*V. dahliae* : KDMFFRATFASAS-EAMSTAIQRLGAAIQTSYRID----- : 562

*N. crassa* : ----- : -  
*U. maydis* : ----- : -  
*A. macrogynus* : ----- : -  
*A. nidulans* : FLGMGC----- : 590  
*B. cinerea* : ----- : -  
*B. dendrobatidis* : ----- : -  
*C. albicans* : ----- : -  
*C. guilliermondii* : ----- : -  
*C. immitis* : ----- : -  
*C. neoformans* : ----- : -  
*C. tropicalis* : ----- : -  
*F. graminearum* : ----- : -  
*F. oxysporum* : ----- : -  
*M. oryzae* : DQDVGNMGMYMGC : 636  
*P. brasiliensis* : ----- : -  
*P. nodorum* : ----- : -  
*P. triticina* : ----- : -  
*R. oryzae* : ----- : -  
*S. cryophilus* : ----- : -  
*S. japonicus* : ----- : -  
*S. pombe* : ----- : -  
*S. punctatus* : ----- : -  
*T. equinum* : ----- : -  
*T. rubrum* : ----- : -  
*U. reesii* : ----- : -  
*V. dahliae* : ----- : -
