# Supplementary material for: Characterization of indole-3-pyruvic acid pathway-mediated biosynthesis of auxin in Neurospora crassa
Source: PubMed Central journal article supplement (PMC5805262; doi:10.1371/journal.pone.0192293), 2018-02-08
Supplement: pone.0192293.s002.pdf [file pone.0192293.s002.pdf]

*N. crassa* : -----MS : 2  
*U. maydis* : ----- : -  
*A. gossypii* : ----- : -  
*A. nidulans* : -----MA : 2  
*A. niger* : -----MAT : 3  
*A. oryzae* : -----MAT : 3  
*B. cinerea* : -----MV : 2  
*C. albicans* : ----- : -  
*C. glabrata* : ----- : -  
*C. globosum* : -----MT : 2  
*C. tropicalis* : ----- : -  
*F. oxysporum* : ----- : -  
*K. africana* : ----- : -  
*K. lactis* : ----- : -  
*M. acridum* : -----MA : 2  
*M. gypseum* : -----MAS : 3  
*M. thermophila* : -----MT : 2  
*N. dairenensis* : ----- : -  
*N. tetrasperma* : -----MS : 2  
*P. anserina* : -----MAI : 3  
*S. cerevisiae* : MVMAHFCINLAVLVEHRKKXIYKQGSFTLLAIRFGFLPFIFLVIFFSQLLFSTHNLTON : 61  
*S. cryophilus* : ----- : -  
*S. japonicus* : ----- : -  
*S. macrospora* : -----MS : 2  
*S. pombe* : ----- : -  
*T. blattae* : ----- : -  
*T. delbrueckii* : ----- : -  
*T. terrestris* : -----MGL : 3  
*U. hordei* : ----- : -  
*V. polyspora* : ----- : -  
*Z. rouxii* : ----- : -

\* \* \*

*N. crassa* : DIRTQSLQKPVTVAEYLFERRLHOIGIRSVHGLPGDFNLVALDYVPKAAA--GLKWWGVSVEL : 60  
*U. maydis* : ---MSNESNQTKIGAYLLERLIVOLGSQSVQGVPGDFNMGFLDLIEEH--PKLKWIGNSNEL : 56  
*A. gossypii* : -----MSEITLGRYLFERLQKQVEVRTIFGVPGDFNLSLLDKVYEV--DCMRWAGNANEL : 52  
*A. nidulans* : DIATRELQPIDIAEYLFERRLHEVGIRSVHGVPGDYNLAALDYLPKCA--GLHWVGNCNEL : 60  
*A. niger* : DIATRDLRKPITVAEYLFERRLHEVGIRSVHGVPGDYNLAALDYLPKCA--GLHWVGNCNEL : 61  
*A. oryzae* : DIATRDLRKPIDVAEYLFERRLREVGVRAVHGVPGDYNLVALDYLPKCA--DLHWVGNCNEL : 61  
*B. cinerea* : DLRTESLQKSPVDLAEYLFERLQKQIGIDSVHGLPGDYNLVALDYLPKLA--GLKWWGVSVEL : 60  
*C. albicans* : -----MSEITLGRFFFERLHOLKQVDTVFGVPGDFNLALLDKIYEV--EGMRWAGNANEL : 52  
*C. glabrata* : -----MSEITLGRYLFERLNOVDVKTIFGLPGDFNLSLLDKIYEV--EGMRWAGNANEL : 52  
*C. globosum* : DIREQGLKPPAITEYLFERLHEIGIRSVHGLPGDFNLVALDYIPKAAA--GLRWWGVSVEL : 60  
*C. tropicalis* : -----MSEITLGRFFFERLHOLQVDTVFGVPGDFNLALLDKIYEV--DCMRWAGNANEL : 52  
*F. oxysporum* : -MSNSNLQKPIDVAEYLFERLRYEVGVRSVHGVPGDYNLVALDYLPQCA--NLKWWGVSVEL : 57  
*K. africana* : -----MAEITLCKYLFERLAQVDVKTIFGLPGDFNLSLLDKIYEV--PCMRWAGNANEL : 52  
*K. lactis* : -----MSEITLGRYLFERLQKQVEVQTIFGLPGDFNLSLLDKIYEV--PCMRWAGNANEL : 52  
*M. acridum* : DIRVQSLRKPIDVSEYLFERLRYEVGVRSVHGVPGDYNLVALDYLPKCA--GLKWWGVSVEL : 60  
*M. gypseum* : DIVTRELEEPVDVAEYLFERLHOMGIKSVHGVPGDYNLAALDYLPKCA--GLHWVGNCNEL : 61  
*M. thermophila* : DIREQGLKPPVNAEYLFERLHOMGIKSVHGVPGDYNLVALDYIPKAAA--GLRWWGVSVEL : 60  
*N. dairenensis* : -----MSEITLGRYLFERLRSQVDVKTIFGLPGDFNLSLLDKIYET--PCMRWAGNANEL : 52  
*N. tetrasperma* : DIRTQSLQKPVTVAEYLFERRLHOIGIRSVHGLPGDFNLVALDYVPKAAA--GLKWWGVSVEL : 60  
*P. anserina* : DIRTQGLKPPVPAQYLFERLRYEIGIRSVHGLPGDFNLVALDYIPKAAA--KWKWWGVSVEL : 61  
*S. cerevisiae* : NTVKSIKMSSEITLCKYLFERLQKQVNVTVFGVPGDFNLSLLDKIYEV--EGMRWAGNANEL : 120  
*S. cryophilus* : -----MAGEILVGEYLFERIRQLGVKSIQGVPGDFNLALLDLIDNVGDESFRWVGNTEL : 55  
*S. japonicus* : ----MSGKEILVGEYLFERLLELGVKSIQGVPGDFNLALLDLIEKIGDSSFRWVGNTEL : 57  
*S. macrospora* : DIRTQSLQKPVTVAEYLFERRLHOIGIRSVHGLPGDFNLVALDYVPKAAA--GLKWWGVSVEL : 60  
*S. pombe* : -----MSGDILVGEYLFERLQKQVNVTVFGVPGDFNLALLDLIEKVGDEKFRWVGNTEL : 55  
*T. blattae* : -----MAEITLCKYLFERLNOVKVQTIFGLPGDFNLSLLDKIYEV--PCMRWAGNANEL : 52  
*T. delbrueckii* : -----MSEITLGRYLFERLQKQVDTNTIFGLPGDFNLSLLDKIYEV--PCMRWAGNANEL : 52  
*T. terrestris* : DIRERGLKPPVAEYLFERLHEIGIRSVHGLPGDFNLVALDYIPKAAA--GLRWWGVSVEL : 61  
*U. hordei* : -----MSSNEIKIGAYLLERLIVOLGTSIQGVPGDFNMGFLDLIEDH--PSLEWIGNSNEL : 54  
*V. polyspora* : -----MSEITLGRYLFERLQKQVQVQTIFGLPGDFNLSLLDKIYEV--PCMRWAGNANEL : 52  
*Z. rouxii* : -----MSEITLGRYLFERLQKQVDTNTIFGVPGDFNLSLLDKVYEV--QGLRWAGNANEL : 52

\* \*

*N. crassa* : NAA~~Y~~AADGYARA--KGISALVTTFGVGELSAINGVAGAYSEHVPIVHIVGCPSTISQRNGM : 119  
*U. maydis* : NAA~~Y~~AADGYARVK--RTIAAVVTTFGVGELSALNGIAGSFSERLPVHVVGVVPSITGAQGSMS : 116  
*A. gossypii* : NAA~~Y~~AADGYARV--KKISCLVTTFGVGELSALNGIAGSYAEHVGVLVHVVGVVPSITSAQAKQL : 111  
*A. nidulans* : NAG~~Y~~AADGYARV--NGIAALVTTFGVGELSAINAIAAGAYSEFVPIIHIVGQPHSRSSQKDGL : 119  
*A. niger* : NAG~~Y~~AADGYARV--NGIGALITTFGVGELSALNIAAGSYSEFVPPVHIVGQPNITKSQKDG : 120  
*A. oryzae* : NAG~~Y~~AADGYARI--NGMSALVTTFGVGELSALNIAAGAYSEFVPIVHIVGQPHITKSQKDG : 120  
*B. cinerea* : NAG~~Y~~AADGYARV--KGISAIMTTFGVGELSAINAIAAGAYSERVPVHIVGTPTISQKDG : 119  
*C. albicans* : NAG~~Y~~AADGYARVNPNGLSALVSTFGVGELSALNIAAGSYSEHVGVINLVGVVPSISSAQAKQL : 113  
*C. glabrata* : NAA~~Y~~AADGYARI--KGMSCIIITFGVGELSALNGIAGSYAEHVGVLVHVVGVVPSISSAQAKQL : 111

C.globosum : NAAYAADGYART--KGISAILTTFGVGELSAINGIAGAFSEHVPVVHIVGCPSTISQRNGM : 119  
C.tropicalis : NAGYAADGYARVNPNGLAALVSTFGVGELSLTNAIAGSYSEHVGIIINLVGVPSSAQAKQL : 113  
F.oxysporum : NAAYAADGYARV--TKMAALIITFGVGELSAVNGVAGSYSEHIVPVHIVGCPSTISQRDQM : 116  
K.africana : NAAYAADGYARI--KGMSCIIITFGVGELSAINGIAGSYAEHVGVLHVVGVPSSISQAQQL : 111  
K.lactis : NAAYAADGYARL--KGMSCIIITFGVGELSAINGIAGSYAEHVGVLHVVGVPSSVSSQAQQL : 111  
M.acridum : NAAYAADGYARI--KQIGALITTFGVGELSAINGVAGAFSEHIVPVHIVGVPSTLSQRDGM : 119  
M.gypseum : NAGYAADGYARI--NGMSALITTFGVGELSAINGIAGAYSEFVPIVHIVGQPSTASQKDCM : 120  
M.thermophila : NAAYAADGYART--KGISAIFTFGVGELSAINGIAGAFSEHVPVVHIVGCPSTISQRNGM : 119  
N.dairenensis : NAAYAADGYARI--KGMSCIIITFGVGELSAINGIAGSYAEHVGVLHVVGVPSSVSSQAQQL : 111  
N.tetrasperma : NAAYAADGYARA--KGISALVTTFGVGELSAINGVAGAYSEHVPVHIVGCPSTISQRNGM : 119  
P.anserina : NAAYAADGYARA--LGISALVTTFGVGELSAMNGVAGAYSEHVPVVHIVGCPSTISQRNGM : 120  
S.cerevisiae : NAAYAADGYARI--KGMSCIIITFGVGELSAINGIAGSYAEHVGVLHVVGVPSSISAQAQQL : 179  
S.cryophilus : NAGYAADGYARV--KGLSAIVTTFGVGELSAINGLAGAYAEHVPVHIVGMPSTKAQSSGA : 114  
S.japonicus : NAGYAADGYARV--KGISAIVTTFGVGELSAINGLAGAYAEHVPVVHIVGMPSTKQASGA : 116  
S.macrospora : NAAYAADGYARA--KGISAIVTTFGVGELSAINGVAGAYSEHVPVHIVGCPSTISQRNGM : 119  
S.pombe : NAGYAADGYARV--NLSAIVTTFGVGELSAINGVAGSYAEHVPVVHIVGMPSTKVQDTGA : 114  
T.blattae : NAAYAADGYARI--KGMACLIITFGVGELSAINGIAGSYAEHVGVLHVVGVPSSLSSQAQQL : 111  
T.delbrueckii : NAAYAADGYARV--KGMALVTTFGVGELSAINGIAGSYAEHVGVLHVVGVPSSISQAQQL : 111  
T.terrestris : NAAYAADGYARI--KGISALVTTFGVGELSAINGVAGAFSEHVPVVHIVGCPSTISQRNGM : 120  
U.hordei : NAAYAADGYARIK--RTISAVVTTFGVGELSAINGIAGSFSERLPVHIVGVPSTAAQGAHS : 114  
V.polyspora : NAAYAADGYARI--KGMACLIITFGVGELSAINGIAGSYAEHVGVLHVVGVPSSLSSQAQQL : 111  
Z.rouxii : NAAYAADGYARV--KGLAALIITFGVGELSAINGIAGSYAEHVGVLHVVGVPSSVSSQAQQL : 111

N.crassa : LLHHTLGNQDFHVFANMSENISCDVAKLVKPSIAYQIDHALRECWIRSRPVYIWLPTDMV : 180  
U.maydis : LLHHTLGDGRFSAFENMSKEISADSAIKSKQGAGESIDRILITAMKSARPVYIWLPTDLV : 177  
A.gossypii : LLHHTLGNQDFTVFRMSANISDTTAVITDISSAPAEIDRCIRACYVHQRPVYIWLPTDMV : 172  
A.nidulans : LLHHTLGNQDYNVFNKGSIVTTANLNDTYDAATLIDNAIRECWIHSRPVYIWLPTDMI : 180  
A.niger : LLHHTLGNQDENVFAKMSAGISCTLGRINETLEAATLIDNAIRECWIRSRPVYIWLPTDMI : 181  
A.oryzae : LLHHTLGNQDENVFTRMSADISCTLGLNSTHEVATLIDNAIRECWIRSRPVYIWLPTDMV : 181  
B.cinerea : LLHHTLGNQDNVFNADMSKEISCAMAKINDPHEAALIDHTLQOCVWHSQPVYIWLPTDMV : 180  
C.albicans : LLHHTLGNQDFTVFRMFKNISQTSAFIADINSAPAEIDRCIRDAYVYQRPVYIWLPTDMV : 174  
C.glabrata : LLHHTLGNQDFTVFRMSANISSETTAMVTDIATAPAEIDRCIRTTYITQRPVYIWLPTDMV : 172  
C.globosum : LLHHTLGNQDENVFANMSSQISCDMARLNKPAEIPDQIDHALRECWIRSRPVYIWLPTDMA : 180  
C.tropicalis : LLHHTLGNQDFTVFRMFKNISQTSAFISDPNTAAEIDRCIRDAYVYQRPVYIWLPTDMV : 174  
F.oxysporum : LLHHTLGNQDENVFANMSAQISCNVAKLNKPSIEAEQIDTALRTCWLRSRPVYIWLPTDMV : 177  
K.africana : LLHHTLGNQDFTVFRMSANISSETTAMVTDIATAPAEIDRCIRTTYVTQRPVYIWLPTDMV : 172  
K.lactis : LLHHTLGNQDFTVFRMSSNISSETTAMITDIATAPAEIDRCIRTTYVSRQRPVYIWLPTDMV : 172  
M.acridum : LLHHTLGNQDENVFANMSSQISQVAKLNRPSEIADQIDHALRECWVHSRPVYIWLPTDMA : 180  
M.gypseum : LLHHTLGNQDENVFANMSAGISCSVAKLNDRDAAYIDSTLRECWVSRPVYIWLPTDMV : 181  
M.thermophila : LLHHTLGNQDENVFANMSSQISCDVARLNKRAEIDQIDHALRECWIRSRPVYIWLPTDMV : 180  
N.dairenensis : LLHHTLGNQDFTVFRMSANISSETTAMVTDIATAPAEIDRCIRTTYVTQRPVYIWLPTDMV : 172  
N.tetrasperma : LLHHTLGNQDHFVFANMSENISCDVAKLVKPSIAYQIDHALRECWIRSRPVYIWLPTDMV : 180  
P.anserina : LLHHTLGNQDENVFANMGSQIACNTARLNKPAEIAEQIDFALRECWIRSRPVYIWLPTDMV : 181  
S.cerevisiae : LLHHTLGNQDFTVFRMSANISSETTAMITDIATAPAEIDRCIRTTYVTQRPVYIWLPTDMV : 240  
S.cryophilus : LLHHTLGNQDGFIVEFNRPVSAYTTVITNGEDAAKIDEALTIYRKRARPVYIWLPTDMA : 175  
S.japonicus : LLHHTLGNQDFTVFMEMSEKVSAYTVMITDGETAADKIDKALSISYRKRARPVYIWLPTDMV : 177  
S.macrospora : LLHHTLGNQDENVFANMSEHISCDVAKLVKPSIEAEQIDHALRECWIRSRPVYIWLPTDMV : 180  
S.pombe : LLHHTLGDGDFRTFMDMFKKVSAYSIMIDNGNDAAEKIDEALSIYKRRARPVYIWLPTDMA : 175  
T.blattae : LLHHTLGNQDFTVFRMSSNISSETTAMITDIATAPAEIDRCIRTTYVSRQRPVYIWLPTDMV : 172  
T.delbrueckii : LLHHTLGNQDFTVFRMSANISSETTAMITDIATAPAEIDRCIRTTYVSRQRPVYIWLPTDMV : 172  
T.terrestris : LLHHTLGNQDENVFANMGSQIACNTARLNKPAEIAEQIDHALRECWIRSRPVYIWLPTDMV : 181  
U.hordei : LLHHTLGDGRFSAFVNMSEKISADSAVLKQKEGVGEAIDRILVLSAMKKAREVYIWLPTDLV : 175  
V.polyspora : LLHHTLGNQDFTVFRMSACISSETTAMITDIATAPAEIDRCIRTTYITQRPVYIWLPTDMV : 172  
Z.rouxii : LLHHTLGNQDFTVFRMSANISSETTAMITDIATAPAEIDRCIRVAYVNRQRPVYIWLPTDMV : 172  
N.crassa : EKKIEGARLDTEIDLSEPNQDREYVVDVVLRYLHGAKNPVILVDACAIRHRVTEEVKR : 241  
U.maydis : HATIPAEALKTELDYSIDDNDAKAEYVLQVAQKHIADAKSAVILVDACAARHGCIQETHE : 238  
A.gossypii : DLTVPASLLETPIDLSLKPNDPEAEVSTVLELVANAKHPVILSDACASRHDVKAETKQ : 233  
A.nidulans : TKKIEGERLKTPIIDLSPNDPEKEDYVVDVVLKYLHAAKNPVILVDACAIRHRVLEEVHD : 241  
A.niger : VKQIEGDRLDKPLDLSLNDPEKEDYVVDVVLKYLHAAKNPVILVDACAIRHRVLEEVHD : 242  
A.oryzae : TKKIEGERLDTPLDLSLNDPEKEDYVVDVVLKYLHAAKNPVILVDACAIRHRVLEEVHD : 242  
B.cinerea : QKKIEGERLKTPIIDLSPNDPEKEDYVVDVVLKYLHAAKNPVILVDACAIRHRVLEEVHD : 241  
C.albicans : DMKVPKSLDKKIDLSLHPNDPEAEVETVEKFISEASNPVILVDACAIRHNCKPEVAK : 235  
C.glabrata : DLKVPKSLLETPIDLSLKPNDPEAEVETVLELILKAAKNPVILADACASRHDVKAETKQ : 233  
C.globosum : EKKIEGARLDTPIDLAEPNDPEREDYVVDVVLKYLHAAKNPVILVDACAIRHRVLEEVHD : 241  
C.tropicalis : DVKVPKSLDKKIDLSLHPNDPEAEVETVEKFISEASNPVILVDACAIRHNCKPEVAK : 235  
F.oxysporum : QEKVEGARLDTPIDLSEPNQDREYVVDVILKAMAYAQRPVILVDACAIRHRVLEEVHD : 238  
K.africana : DLKVPKSLLETPIDLSLKPNDPEAEVETVILSLIKDAKNPVILSDACASRHDVKAETKQ : 233  
K.lactis : DLTVPASLLETPIDLSLKPNDPEAEVETVILQLIKEAKNPVILADACASRHDVKAETKQ : 233  
M.acridum : DAKVEGARLDRPIDLSEPNQDPEKEDYVVDVIMKYLNAAKNPVILVDACAVRHRVLEEVHD : 241  
M.gypseum : KQKIEGKRLKTPIIDLQLPNDPEKEDYVVDVVLKYLQAAKNPVILVDACAIRHNCKPEVAK : 242  
M.thermophila : ERKVEGARLDTPIDLSEPNQDREYVVDVILRYLHAAKNPVILVDACAIRHRVLEEVHD : 241  
N.dairenensis : DLKVPASLLETPIDLSLKNQDPEAEVETVNTILELIKDAKNPVILADACASRHDVKAETKQ : 233  
N.tetrasperma : EKKIEGARLDTEIDLSEPNQDREYVVDVVLRYLHGAKNPVILVDACAIRHRVTEEVKR : 241

P. anserina : EKQIEGARLDTPIDLSPPNEPEREDYVVDVVLRYLHAAKNPIILVDACAIRHRRCLEEVNRN : 242  
S. cerevisiae : DLNVPAKLQTPIDMSLKPNDAAESEKEVIDTILALVKDAKNPVILADACCSRHDDVKAETKK : 301  
S. cryophilus : YFKTSSANLRKPLETEEPENEVSEQEVITTTVAEMIEKSKKPVILVDACAIRHRVVPVKQ : 236  
S. japonicus : YFKTSSAGLKKPLQLEEPANDPKIEEEVVHTIVQMINASKKPVILADACVTRHRVVIKELHE : 238  
S. macrospora : EKKIEGARLDTEIDLSEPNDDREYVVDVVLKYLHGAKNPVVLVDACAIRHRVTEEVNK : 241  
S. pombe : YFKASSNLGKRLKLEEDTNDPAVEQEVINHISEMVVNAKPKVILADACAVRHRVVPVHE : 236  
T. blattae : DLTVPASLLETPIDLSLKPNDAAEAENEVIETVLELVREAKNPIIADACCSRHDDVKSETE : 233  
T. delbrueckii : DLKVPASLLETPIDLSLKANDAEAQEVVDDVLLALIKAAKNPVILADACCSRHDDVKEETRK : 233  
T. terrestris : EKKIEGARLDTPIDLTEPENAEREDYVVDVVLKYLHAAKCPILVDACAVRHRVVLKEVHD : 242  
U. hordei : HATIPADALKTKLKYDAEPNDEAAEKYVLNVAKKHIEQAKSAVILVDACADRHGICIAETRE : 236  
V. polyspora : DLMVPADLTKTPIDLSLKPNDPEAETEVLDTILAMVKEAKNPIILADACASRHDDVKAETKQ : 233  
Z. rouxii : DQKVPASLLETPIDLSLKENDEAETEVDVTLVLELIKEAKNPVILADACCSRHDDVKAETKK : 233

N. crassa : FIEKTKLPLVFTPMGKGAFFDETSEHYGGVYAGTGSLLP-EVAKRVEGSDLVLSIGAIKSDFN : 301  
U. maydis : LIEKSGLPVFATPMGKTIVDEHQAQYGGIYVGSLSISE-KVKNVVEQADVLTIVGSLKSDFN : 298  
A. gossypii : LIDVTQFPAFVTPMGKGSIDEQHPFRFGVYVGTLSAP-DVKEAVESADLILSVGALLSDFN : 293  
A. nidulans : LIEVSGLPFVAPMGKGAVNETHRCYGGVYAGTGSNP-GVREQVESDILILSIGAIKSDFN : 301  
A. niger : LMEASGLPFTVAPMGKGAVDETRPNYGGVYAGTGSNA-GVREQVESDILILSIGAIKSDFN : 302  
A. oryzae : FVEKSGLPFTVAPMGKGAVDETHKNYGGVYAGTGSNP-GVREQVESDILILSIGAIKSDFN : 302  
B. cinerea : LIEKTKLPLVFTPMGKGAFFDETSENYGGVYAGSGSHP-DVKHRVESDILILTIGAIKSDFN : 301  
C. albicans : LIEETQFVFTTPMGKSSVDESNPRFGVYVGSLSKP-EVKESVESADLILSIGALLSDFN : 295  
C. glabrata : LIDATQFPSFVTPMGKGSIDEQHPFRFGVYVGTLSRP-EVKEAVESADLILSVGALLSDFN : 293  
C. globosum : LVEKTKLPLVFTPMGKGAFFDETSENYGGVYAGTGSNP-AVAERVESADLILSIGALLSDFN : 301  
C. tropicalis : LIAETQFVFTTPMGKSSVDESNPRFGVYVGSLSKP-DVKEAVESADLILSVGALLSDFN : 295  
F. oxysporum : LIDKLDLPLVFTPMGKGAFFDETHPNYGGVYAGTGSNP-GVREQVESDILILSIGALLSDFN : 299  
K. africana : LIDATQFPAFVTPMGKGSIDEQHPFRFGVYVGTLSRP-EVKEAVESADLILSVGALLSDFN : 293  
K. lactis : LIDLTQFPAFVTPMGKGSIDEKHPFRFGVYVGTLSRP-AVKEAVESADLILSVGALLSDFN : 293  
M. acridum : LLAKTNLPLVFTPMGKSAVNEQHDNFGVYAGSGSHPPEVKNIIVESDILVVSIGALKSDFN : 302  
M. gypseum : LVSKSGLPFTVAPMGKGAFFDETLPNYGGVYAGDGSSTV-EVQKHIEASDILILSIGAVKSDFN : 302  
M. thermophila : LVEKTKLPLVFTPMGKGAFFDETHPNYGGVYAGTGSNP-AVAERVESADLILSIGALLSDFN : 301  
N. dairenensis : LIDITQFPSFVTPMGKGSIDEQHPFRFGVYVGTLSRP-AVKEAVESADLILSVGALLSDFN : 293  
N. tetrasperma : FIEKTKLPLVFTPMGKGAFFDETSEHYGGVYAGTGSLLP-EVAKRVEGSDLVLSIGAIKSDFN : 301  
P. anserina : LVDKAKLPLVFTPMGKGAFFDETSEHYGGVYAGTGSNP-AVQELVESADLILSIGALLSDFN : 302  
S. cerevisiae : LIDLITQFPAFVTPMGKGSIDEQHPFRFGVYVGTLSKP-EVKEAVESADLILSVGALLSDFN : 361  
S. cryophilus : LIELTHFPTVTPMGKSSALNETSKYFDGVYIGSISDP-QVKERIESTDILILSVGALLSDFN : 296  
S. japonicus : LINLTHFPTVTPMGKSSVDEVESEWFDGVYIGSISDP-AVKDRIESSDILILSVGALLSDFN : 298  
S. macrospora : FIEKTKLPLVFTPMGKGAFFDETSEHYGGVYAGTGSLLP-EVAKRVEGSDLVLSIGAIKSDFN : 301  
S. pombe : LIKLTHFPTVTPMGKSAIDETSQFFDGVYIGSISDP-EVKDRIESTDILILSVGALLSDFN : 296  
T. blattae : LINATQFPSFVTPMGKGSINERHPRFGVYVGTLSRP-EVKAAVESADLILSVGALLSDFN : 293  
T. delbrueckii : LIDITQFPSFVTPMGKGSIDEQHPFRFGVYVGTLSRP-EVKEAVESADLILSVGALLSDFN : 293  
T. terrestris : LVEKTKLPLVFTPMGKGAFFDETHPNYGGVYAGTGSHP-DVAERVESADLILSIGALLSDFN : 302  
U. hordei : LIEKSGLPVFATPMGKGAFFDETHPNYGGVYAGTGSNP-KVKEVVEGADVLTIVGSLKSDFN : 296  
V. polyspora : LIDITQFPCFVTPMGKGSIDEQHPFRFGVYVGTLSRP-EVKAAVESADLILSVGALLSDFN : 293  
Z. rouxii : LIDLITQFPSFVTPMGKGSIDEQHPFRFGVYVGTLSRP-EVKEAVESADLILSVGALLSDFN : 293

N. crassa : TAGFSYHTSOLNTIDLHSDHCTVRYSEYPGVAMRGVLRKVTERRIDMSKL-SITSEPPVEN- : 360  
U. maydis : SENFSYRTPKSSSTIELHSDYTTIGYSHYPGIGMKKLLPKLSALLETNNGDARRETKKIVPK : 359  
A. gossypii : TGSFSYSYKTKNIVEFHSHTKIRSATFPGVQMKFVLRKVIQRLG--FI-KADVPVPHISNA : 353  
A. nidulans : TAGFSYRIGOLNTIDFHSYTVRVRYSYEPDINMKGVLRKVIQRLG--FI-KADVPVPHISNA : 359  
A. niger : TGSFSYHIGOLNTIDFHSYTVRVRYSYEPDINMKGVLRKVIQRLG--AV-NAAPVPHLSNT : 360  
A. oryzae : TGSFSYRIGOLNTIDFHSYTVRVRYSYEPDINMKGVLRKVIQRLG--NL-NVGPVSPSNL : 360  
B. cinerea : TAGFSYKTSOLNTIDFHSHTKIAVRYSEYPGVAMRGVLRKVIQRLG--AV-NAAPVPHLSNT : 360  
C. albicans : TGSFSYGYKTRNIVEFHSYDKIRQATFPGVQMKFALQKLLTKVKSINPNYTPVPVPETK : 356  
C. glabrata : TGSFSYSYKTKNIVEFHSYDKIRNATFPGVQMKFALQKLLNAVPEAIK-GYKPVVPPARV : 353  
C. globosum : TAGFSYRISOLNTIDFHSYDKIRNATFPGVQMKFALQKLLNAVPEAIK-CRPSPPVAN- : 360  
C. tropicalis : TGSFSYNYKTRNIVEFHSYDKIRQATFPGVQMKFALQKLLTKVKSINPNYTPVPVPAT- : 355  
F. oxysporum : TGSFSYRISOLNSIDLHSDHCVRYSTYPGVAMRGVLRKVIDRVPDKSM-PAPSIPEVRN- : 358  
K. africana : TGSFSYSYKTKNILEFHSYDKIRNATFPGVQMKFALQKLLASVADAAG-GYKPVVPPARV : 353  
K. lactis : TGSFSYSYKTKNIVEFHSYDKIRSATFPGVQMKFALQKLLTKVADAAG-GYKPVVPPSEP : 353  
M. acridum : TAGFSYRISOLNSIDLHSDHCVRYSTYPGVAMRGVLRKVIDRVPDKSM-PAPSIPEVRN- : 361  
M. gypseum : TGTFTYRVSRLNTIDFHSNHMVRYSEYPGVAMRGVLRKVVNRVLDLTKL-SRPPSPEVVN- : 359  
M. thermophila : TAGFSYRISOLNTIDFHSYDKIRNATFPGVQMKFALQKLLNAVPEAIK-GYKPVVPPARV : 360  
N. dairenensis : TGSFSYSYKTKNIVEFHSYDKIRNATFPGVQMKFALQKLLGSVAEAAK-GYKPVVPPAKP : 353  
N. tetrasperma : TAGFSYHTSOLNTIDLHSDHCTVRYSEYPGVAMRGVLRKVTERRIDMSKL-SITSEPPVEN- : 360  
P. anserina : TGSFSYRISOLNTIDFHSYDKIRNATFPGVQMKFALQKLLNAVPEAIK-GYKPVVPPARV : 362  
S. cerevisiae : TGSFSYSYKTKNIVEFHSYDKIRNATFPGVQMKFALQKLLTIADAAG-GYKPVVPPART : 421  
S. cryophilus : TGSFSYHLSOKNVEFHSYDKIRNATFPGVQMKFALQKLLTIADAAG-GYKPVVPPART : 356  
S. japonicus : TGSFSYHISOKNTEFHSYDKIRNATFPGVQMKFALQKLLTIADAAG-GYKPVVPPART : 358  
S. macrospora : TAGFSYHTSOLNTIDLHSDHCTVRYSEYPGVAMRGVLRKVTERRIDMSKL-SITSEPPVEN- : 360  
S. pombe : TGSFSYHLSOKNAVEFHSYDKIRNATFPGVQMKFALQKLLKVLDAKAM-HSKAAPTIGYN : 356  
T. blattae : TGSFSYAYKTKNIVEFHSYDKIRNATFPGVQMKFALQKLLVSKIGAAIK-GYKPVVPPAGI : 353  
T. delbrueckii : TGSFSYSYKTKNIVEFHSYDKIRNATFPGVQMKFALQKLLAKVGDVAK-DYKPVVPPART : 353  
T. terrestris : TGSFSYRISOLNTIDFHSYTCQVRYSEYPGVAMRGVLRKVVNRVLDLTKL-SQPSPEQVVN- : 361

U. hordei : SGNFSYRTPKESTIELHSDYTTVGYSHYPGIGMKGLLPKLSAILQPDQARRLEETKTVVPK : 357  
V. polyspora : TGSFSYSYQTKNVVEFHS DHTRIKKASFPGVQMKFVLLQKLVAQIGAAVK-DYKPVAAALP : 353  
Z. rouxii : TGSFSYSYKTKNVVEFHS DHIKIRNATFPGVQMKFVLLKLLQAVPEAVK-NYKPGVPPAPP : 353

\* \* \* \* \*

N. crassa : --AVAENRDSQAITOAWFWPRVGEYFQEGDVVVTETGTANFGIWESRFPKDVMCVTQVLW : 419  
U. maydis : F-ENALPHDSSSTITOEWLWPRMGFFQEQDQVIVETGTS SFGMLEAKLPKAKTRWVSQVLW : 419  
A. gossypii : --APNEDADPKTPLKQEWLWVQVSSFLKEGDIVITETGTAAFGINQTRFPSSTIGISQVLW : 412  
A. nidulans : L-PEHEKNSSEQRITHAWMWPVWGQWLKENDIVITETGTANFGIWDTRFPGSVTAISQVLW : 419  
A. niger : L-PESEKSSSQEITHDWLWPNVWGQWLKENDIVITETGTANFGIWEWTRFPANVTAISQVLW : 420  
A. oryzae : L-PDNEKASTEQAITHAWLWPTVWGQWLKEDVIVITETGTANFGIWDTRFPAGVTAISQVLW : 420  
B. cinerea : --KVTANEDSSETITOAWFWPRAGEFLKENDIVITETGTANFGIWEWTKFPKGVTAISQVLW : 419  
C. albicans : --LINTPAAPSTPLTOEYLWTKVSSWFREGDIIITETGTSAFGIVQSRFPKNSIGISQVLW : 415  
C. glabrata : --PENKSCDPATPLKQEWLWVQVSSFLKEGDIVITETGTAAFGINQTRFPSNNAYGISQVLW : 412  
C. globosum : --EVTKNRDSSETITOAWFWPRVGEYFLKEDDIVVITETGTSNFGIWEWTKYPRGVTCVTQILW : 419  
C. tropicalis : --KAITTPGNNDPVSOEYLWRKVSDFWQEGDVIITETGTSAFGIVQSKFPKNAIGISQVLW : 414  
F. oxysporum : --EVEKNTDSEIITOCALWPRVGEYLLIPNDIVVITETGTANFGIWDTRFPRNVTAISQVLW : 417  
K. africana : --PENKACDPS TPLAQEWMWVQCAKFFQEGDVIITETGTSAFGINQSLFPNNSVGISQVLW : 412  
K. lactis : --EHNEAVADSTPLKQEWVWVQVGFLEQGDVIVITETGTSAFGINQTHFPNNTYGISQVLW : 412  
M. acridum : --EAKEHDESATITHAWFWPRLGEFLTDNDIVVITETGTSNFGIWDTRFPGSVTAMSOVLW : 420  
M. gypseum : L-PEENPQFPAPTISHSWLWPAVGNWVQENDIVITETGTS SFGIWTGTRFPKGVTAISQVLW : 419  
M. thermophila : --EVTKNRDSQITITOAWFWPRIGEYFLKENDIVVITETGTSNFGIWEWTKYPRGVTCVTQILW : 419  
N. dairenensis : --ANAADVAAATPLKQEWVWVQVGFLEQGDVIVITETGTSAFGINQTHFPNNTYGISQVLW : 412  
N. tetrasperma : --AVAENRDSQAITOAWFWPRVGEYFQEGDVVVTETGTANFGIWESRFPKDVMCVTQVLW : 419  
P. anserina : --EVSENRDSTETITOAWFWPRVGEYFKEKDLVVTETGTSNFGIWEWTKYPRDVTGVTQILW : 421  
S. cerevisiae : --PANAAVPASTPLKQEWVWVQVGFLEQGDVIVITETGTSAFGINQTHFPNNTYGISQVLW : 480  
S. cryophilus : IKPKHAEGYSQQITCSWFVWPNFGHFLKPKDVVVTETGTANFGIWDTRFPKGVTAISQVLW : 417  
S. japonicus : VKPVHAEGFPKDSITHQWFWPKFSEFLIPRDVVTETGTANFGVLDVRFPHNVTAISQVLW : 419  
S. macrospora : --AVAENKDSQITITOAWFWPRVGEYFLQEGDVVVTETGTANFGIWEWTKYPRDVTGVTQILW : 419  
S. pombe : IKPKHAEGYS SNEITHCWFVWPKFSEFLKPRDVLITETGTANFGVLDVRFPKDVTAISQVLW : 417  
T. blattae : --PANKEVPANTPLKQEWLWVQVSSFLKEGDIVLVTETGTSAFGINQTHFPKDTYGISQVLW : 412  
T. delbrueckii : --PENAAATDSTPLKQEWLWVQVSSFLKEGDIVLVTETGTSAFGINQTHFPKNTYGISQVLW : 412  
T. terrestris : --KVAENWDDSETITOAWFWPRIGEYFLKENDIVVITETGTANFGIWEWTKYPRGVTCVTQILW : 420  
U. hordei : F-QNALPSDSDVISOEYLWPRMGRFFKEQDQVIVETGTS SFGMLEAKLPKNTRWVSQVLW : 417  
V. polyspora : --ASNAECPASTPLKQEWLWVQVSSFLKEGDIVLVTETGTSAFGINQTHFPNNTYGISQVLW : 412  
Z. rouxii : --SPNAEVADSTTLKQEWLWRQVGSFLREGDVVITETGTSAFGINQTHFPNQTYGISQVLW : 412

\* \* \* \* \*

N. crassa : GSIQWVSGAAQGAALAVKD-LEQDRRTILFVGDGSLQLTQAEVSTMLKHN-LRVTMLH--- : 475  
U. maydis : GSIQWVSGATLGVLAARE--NALGRTHLFGVGDGSLQLTQAEIGTMIKHG-LCPYLFILNN : 477  
A. gossypii : GSIQFTTGACLGAAFAAEE-IDPKKRIVILFIDGDSLQLTQAEI STMVVRWG-LKPYLFVLLN : 471  
A. nidulans : GSIQYVSGACQGAALAAKE-QG-NRRTVLVWVGDGSLQLTQAEI STMIRNN-LNPPIIFVICN : 477  
A. niger : GSIQYVSGACQGAALAAKE-LG-NRRTVLVWVGDGSLQLTQAEI STMIRNN-LNPPIIFVICN : 478  
A. oryzae : GSIQYVSGACQGAALAAKE-QG--RRTVLVWVGDGSLQLTQAEI STMIRNN-LNPPIIFVICN : 477  
B. cinerea : GSIQYVSGACQGAALAAKD-AGSDSRTILFVGDGSLQLTQAEVSTMLRGL-LKPIIFVICN : 478  
C. albicans : GSIQYVSGATCGAAMAQAE-LDPKRRVILFVGDGSLQLTQAEI STMCKWECNNTYLFVLLN : 475  
C. glabrata : GSIQFTTGACLGAAFAAEE-IDPKKRIVILFIDGDSLQLTQAEI STMIRWG-LKPYLFVLLN : 471  
C. globosum : GSIQWVSGAAQGAALAAKD-MGTDRTILFVGDGSLQLTQAEVSTMMRHN-LKVTIFLIYN : 478  
C. tropicalis : GSIQYATGATCGAAMAQAE-IDPKRRVILFVGDGSLQLTQAEI STMCKWDCNNTYLFVLLN : 474  
F. oxysporum : GSIQWVSGACQGAALAAKD-AGKEGRTILFVGDGSLQLTQAEI STMIRRH-LKPTIFVICN : 476  
K. africana : GSIQFTGAVLGAFAAEE-IDPKKRIVILFIDGDSLQLTQAEI STMIRWN-LKPYLFVLLN : 471  
K. lactis : GSIQFTTGATLGAFAAEE-IDPKKRIVILFIDGDSLQLTQAEI STMIRWG-LKPYLFVLLN : 471  
M. acridum : GSIQWVSGACQGAALAAKE-MGEKRRRTILFVGDGSIQLTQAEI STMIRHE-LSPIIFVICN : 479  
M. gypseum : GSIQYVSGACQGAALATKE--GASRRTILFIDGDSLQLTQAEI STMIRNG-LTPPIIFVICN : 477  
M. thermophila : GSIQWVSGAAQGAALAAKD-MGVDRTILFVGDGSLQLTQAEVSTMIHRD-LRITIFLIFN : 478  
N. dairenensis : GSIQFTTGACLGAAFAAEE-IDPKKRIVILFIDGDSLQLTQAEI STMVVRWN-LKPYLFVLLN : 471  
N. tetrasperma : GSIQWVSGAAQGAALAVKD-LEQDRRTILFVGDGSLQLTQAEVSTMLKHN-LRVTMLH--- : 475  
P. anserina : GSIQWVSGAAQGAQAVKD-MGEDRTILFVGDGSLQLTQAEVSTMIKHK-LRVTIFLIYN : 480  
S. cerevisiae : GSIQFTTGATLGAFAAEE-IDPKKRIVILFIDGDSLQLTQAEI STMIRWG-LKPYLFVLLN : 539  
S. cryophilus : GSIQYVSGAFFGAALGVKDSSEPDRTILVGDGSLHLLTATEI STCVRQN-LKPIIFVICN : 477  
S. japonicus : GSIQYVSGAFFGAALGVYDSAEQDRRTILVGDGSLQLTQAEI STFIRQG-LKPIIFVICN : 479  
S. macrospora : GSIQWVSGATQGAALAVKD-LEQDRRTILFVGDGSLQLTQAEVSTMMKHN-LRVTIFLIYN : 478  
S. pombe : GSIQYVSGAMFGAVLAVHDSKEPDRTILVGDGSLQLTQAEI STCIRHN-LKPIIFVICN : 477  
T. blattae : GSIQFTGCVLGAFAAEE-INPNKRRTILFIDGDSLQLTQAEI STLRWN-LKPYLFVLLN : 471  
T. delbrueckii : GSIQFTTGATLGAFAAEE-IDPKKRIVILFIDGDSLQLTQAEI STMVVRWG-LKPYLFVLLN : 471  
T. terrestris : GSIQWVSGAAQGAALAAKD-MGVDRTILFVGDGSLQLTQAEVSTMIHRN-LKVTIFLIYN : 479  
U. hordei : GSIQWVSGATLGVLAARE--NKLGRTCFLVGDGSLQLTQAEIGTMIKHG-LTPYLFVLLN : 475  
V. polyspora : GSIQFTGATLGAFAAEE-IDPKKRIVILFIDGDSLQLTQAEI STMIRWN-LKPYLFVLLN : 471  
Z. rouxii : GSIQYVSGATLGAFAAEE-IDPKKRIVILFIDGDSLQLTQAEI STMIRWG-LKPYLFVLLN : 471

N. crassa : -----YRTLH-PWHGRGL-----QRC----- : 490  
U. maydis : DGYETIERQIHGPORSYNDIP-PYDHSLLLDFFGN--EKF-HSDAKSHENDPHQSKQYYRV : 534  
A. gossypii : DGYETIERLIHGETAQYNCIQ-PWKHLDLLPTFGA--KDY-----ETHRV : 512

A.nidulans : EGYTIERFIHGWDESYNDIQ-TWDIKGLPVAFGGK-GRY-----KGYKV : 519  
 A.niger : NGYTIERYIHGWDESYNDIQ-PWDIEGLPRVFGAK-DKY-----KGYKV : 520  
 A.oryzae : EGYTIERYIHGWEAVYNDIQ-PWDFLNIPVAFGAK-DKY-----KGYKV : 519  
 B.cinerea : DGYTIERFIHGMEEEYNDIA-TWNNKDLVPAFGAKEGKY-----KLHQI : 521  
 C.albicans : DGYTIERLIHGEKAQYNDIQ-PWNNLQLLPLFNA--KDY-----ETKRI : 516  
 C.glabrata : DGYTIERLIHGEKAGYNDIQ-NWDHLALLPTFGA--KDY-----ENHRV : 512  
 C.globosum : EGFTIERYIHGMEAEYNDVV-RWQYTDVPTVFGGSDKQV-----RKFVI : 521  
 C.tropicalis : DGYTIERLIHGEKAQYNDIQ-PWNNLQLLPLFNA--KKY-----ETKRI : 515  
 F.oxysporum : DGFTIERFIHGMDAVYNDIN-NWKYKDLVSVFGGE-KTC-----KTFQI : 518  
 K.africana : DGYTIERLIHGEKAGYNDIQ-NWKHLMLLETFGA--KDY-----ENHRV : 512  
 K.lactis : DGYTIERLIHGETAQYNCIQ-NWQHLELLPTFGA--KDY-----EAVRV : 512  
 M.acridum : EGFTIERFIHGMDATYNDIA-KWDNRALVDVFGGQ-GKA-----QKFAV : 521  
 M.gypseum : NGYTIERYIHGWNAAYNDIQ-EWKFKIIPSAFGAQPDQF-----TTYQI : 520  
 M.thermophila : GGFTIERFIHGMEAEYNDIT-RWNYIDVPTAFGGSEKQV-----RKFVV : 521  
 N.dairenensis : NGYTIEKLIHGPTAQYNEIQ-SWDHLSLLPTFGA--KDY-----ENHRV : 512  
 N.tetrasperma : -----MRTLH-PW-----YGRGLQRY : 490  
 P.anserina : EGFTIERCIHGMEAEYNDIR-RWNYTEIPTVFGATDKEV-----RKHII : 523  
 S.cerevisiae : DGYTIEKLIHGPKAQYNEIQ-GWDHLSLLPTFGA--KDY-----ETHRV : 580  
 S.cryophilus : DGYTIERLIHGLHAGYNDINTNWQYQDMLKFFGA--KQY-----RSYRV : 519  
 S.japonicus : NGYTIERLIHGLHAVYNEINTKWGYQELKFFGA--DQS-----RTYKV : 521  
 S.macrospora : EGFTIERYIHGMDADYNDII-RWNYTDIPAVFGAKEGHG-----QKFVI : 521  
 S.pombe : DGYTIERLIHGLHASYNEINTKWGYQQIPKFFGAENHF-----RTYCV : 521  
 T.blattae : NGYTIEKLIHGPTAQYNEIQ-GWNHLQILPTFGA--KDY-----EALRV : 512  
 T.delbrueckii : DGYTIERLIHGEKAQYNDIQ-PWKNLDLLPTFGA--KDY-----ETHRV : 512  
 T.terrestris : EGFTIERFIHGMEAEYNNIA-RWQYTEVPAVFGASDKQC-----RKFVV : 522  
 U.hordei : DGYTIERQIHGPERKYNDIP-PYDHSMLDFFGD--QKAGKREGKSHEKDMEPSKKQFYRV : 533  
 V.polyspora : DGYTIEKLIHGPTAQYNEIQ-NWKHLDILPTFGA--KDY-----EAIRV : 512  
 Z.rouxii : DGYTIERLIHGETAEYNCIQ-PWKHLELLNTFGA--KDY-----ENHRV : 512

N.crassa : -----HPLELYRY-----PRGLWROGRPV : 509  
 U.maydis : QTKQQLDELKQSFANPDRIR-----LIEVVMQRGDAPEALKROAET : 578  
 A.gossypii : ATTGEWRALTEKQEFNKNSIR-----MIEIMLDVMDAPSSLIKQAKLT : 556  
 A.nidulans : TTRDELTKLFASEEFSSAPCLQVSLCDLTHYLSDFEQLVEVHMPREDA PASLKITAEAA : 580  
 A.niger : KTRDELRLQLFANQEFASAPYLQ-----LVELHMPRDDAPAAALKITAEAA : 564  
 A.oryzae : TTRDELRELFANQEFASAPCLQ-----LVELHMPRDDCPASLKLTAESA : 563  
 B.cinerea : KTKDQVNELFNKEFNNSADCLQ-----FVELYIPKEDAPRALVLTAEAS : 565  
 C.albicans : STVGEINDLFADKAFVDPKIR-----MVEVMLPTMDAPANLVQAQKLS : 560  
 C.glabrata : ATTGEWDKLTQDKFENKNSIR-----MIEVMLPVMDAPTSLLIEQAKLT : 556  
 C.globosum : KTKDELKLLTDKEFNNAAGLQ-----FVELWMPKDDAPRALKITAEIA : 565  
 C.tropicalis : STVGEINDLFNKEFAVPDRIR-----MVEIMLPVMDAPANLVQAQKQS : 559  
 F.oxysporum : KTKTELNE LLTNKEFNAAECLQ-----FVELYMPREDA PRALIMTAEAS : 562  
 K.africana : ATTGEWDALMGDKFENKNSRIR-----MIEVMLPVMDAPSNLVQAQKIT : 556  
 K.lactis : STTGEWNKLTTDKEFQDNTRIR-----LIEVMLPTMDAPSNLVQAQKIT : 556  
 M.acridum : KTKDELNE LLASPSFKANQLQ-----LVEIYMPKDDAPRLLLMTAEAS : 565  
 M.gypseum : RERQELDLFSNKEFCSAKRLQ-----IVEVYTPQEDAPSTLRLTAEAA : 564  
 M.thermophila : KTKDELEELTDTDFNEARGLQ-----FVELWMPKDDAPRALKITAEIA : 565  
 N.dairenensis : ATTGEWIKLTENKEFNQNSRIR-----LIEIMLPVMDAPSNLVQAQKIT : 556  
 N.tetrasperma : -----HPLELYRY-----PRGLWROGRPV : 509  
 P.anserina : KTKSELEKLLADKDFNDAGLQ-----LVELWMPKDDAPRALKLTAEQS : 567  
 S.cerevisiae : ATTGEWDKLTQDKSFNNSKIR-----MIEIMLPVFDAPQNLVEQAKLT : 624  
 S.cryophilus : KTPQELKLFNDKQFASADVIQ-----LVEVIMPLDAPRILVEQAKLT : 563  
 S.japonicus : QTPSDVEKLFKDKQFASADVIQ-----LVEVMPPTFDAPRILVEQAKLT : 565  
 S.macrospora : KTKDELEELKDKDFNEYKGLQ-----FVELWMPKDDAPRALKLTAEIS : 565  
 S.pombe : KTPDVEKLFSDKEFANADVIQ-----VVELVMPMLDAPRVLVEQAKLT : 565  
 T.blattae : ATTGEWIKLTTDKAFQKNSKIR-----MIEIMLPVMDAPSNLVQAQKIT : 556  
 T.delbrueckii : STTGEWNKLTTDSEFNNSKIR-----MIEVMLPVMDAPSSLVQAQKIT : 556  
 T.terrestris : KTKDQLEKLLTDKEFNNAAGLQ-----FVELWLPKEDAPRALRITTEVA : 566  
 U.hordei : QGRKQLELLESEDEFKPDRIIR-----VVELMMERGDAPKALKROAET : 577  
 V.polyspora : ATTGEFNKLCEDKAFNNSKIR-----MIEIMLPVMDAPSNLVQAQKIT : 556  
 Z.rouxii : STVGEWNKLTQDKFENNSRIR-----MIEVMLEVMDAPSSLVQAQKIT : 556

N.crassa : SEVRYQDKG-- : 518  
 U.maydis : GQANKYE---- : 585  
 A.gossypii : AATNAQP---- : 563  
 A.nidulans : ASRNK----- : 585  
 A.niger : ATRNK----- : 569  
 A.oryzae : AERNKSL---- : 570  
 B.cinerea : AKNNAKD---- : 572  
 C.albicans : EKTNAEQ---- : 567  
 C.glabrata : ASTNAKQ---- : 563  
 C.globosum : AKNNAKMSD-- : 574  
 C.tropicalis : AATNAAQE--- : 567  
 F.oxysporum : ARNNAKHH--- : 570

K.africana : AATNAKQD--- : 564  
K.lactis : AATNAKN---- : 563  
M.acridum : AKTNARKE--- : 573  
M.gypseum : AKRNG----- : 569  
M.thermophila : ARNNASMSE-- : 574  
N.dairenensis : AKINAKQD--- : 564  
N.tetrasperma : SEVRHQDKG-- : 518  
P.anserina : AKNNARME--- : 575  
S.cerevisiae : AATNAKQ---- : 631  
S.cryophilus : AKINQE----- : 569  
S.japonicus : AKINKQ----- : 571  
S.macrospora : AKNNSRNEDEQ : 576  
S.pombe : SKINKQ----- : 571  
T.blattae : AATNAKQ---- : 563  
T.delbrueckii : ASINAKN---- : 563  
T.terrestris : ARTNARVE--- : 574  
U.hordei : GTANKYE---- : 584  
V.polyspora : ASINAKQ---- : 563  
Z.rouxii : AATNAKQ---- : 563
