# Supplementary material for: Characterization of indole-3-pyruvic acid pathway-mediated biosynthesis of auxin in Neurospora crassa
Source: PubMed Central journal article supplement (PMC5805262; doi:10.1371/journal.pone.0192293), 2018-02-08
Supplement: pone.0192293.s003.pdf [file pone.0192293.s003.pdf]

N.crassa : -----MSSNVFVEIKTEVVT-GTYKQPTGLFINNEFVEGVDK : 35  
 U.maydis : -----MPTLNLDLPNGIK---STIQADLFINNKFVPALDG : 32  
 A.delicata : -----MAPTFSYTFDHFYSYSGKVTFAGVYIDGKYSDAEG : 36  
 A.flavus : -----MADLETTIETPSA--KYEQPLGLFINNEFVKAKSG : 33  
 A.nidulans : -----MSDLETTIETPVI--KYEQPLGLFINNEFVKAGVEG : 33  
 A.oryzae : MTPDGSRITEPDRDTPFLVYFVSSLTMADELETTIETPSA--KYEQPLGLFINNEFVKAKSG : 59  
 B.cinerea : -----MTSVQIKTELT-GEYTOPTGLFINNEWVKGVGDG : 32  
 C.albicans : -----MFKKALPLVSKLITPKG-ITYNQPLGLFINNEYVHPKQQ : 38  
 C.cinerea okayama : -----MPSTFSYQWDTFAYKGTETENTGLFINGQFVDGSKN : 36  
 C.immitis : -----MALFQKIETPSC--TYEQPLGLFINNEFVKAGVEG : 32  
 C.tropicalis : -----MFNKALPLVAKLITPKG-LTYNQPLGLFINNEFVQPKSN : 38  
 F.mediterranea : -----MPQTFTYEFNTEVFKGKTSFSTGLYIDGKSVDGVDG : 36  
 F.oxysporum : -----MAPLTVELSTPVT-GTYQQPIGLFIDGKWTEGVDK : 34  
 G.graminis : -----MANLETELKTEAT-GAFKQPLGLFINNEWVEGSDK : 34  
 M.larici-populina : -----MIPEIKIQFPPIETNLEPITLKTGLFINNEFVSSSDN : 36  
 P.brasiliensis : -----MALFQQITPPTI--TYEQPLGLFINNEFVKAGVEG : 32  
 P.chrysogenum : -----MSLETTIQTPNV--TYEQPLGLFINNEFVKGVGDG : 32  
 P.nodorum : -----MSGLSVKLITPQT-GEYDQPTGLFINNEWKAVDG : 34  
 P.teres : -----MSETSVKIKTPQT-GEYEQPTGLFINNEWKSVDG : 34  
 S.commune : -----MTSFSYEFKTEAYTGKVNFTGVFIDGKFESESGK : 35  
 S.japonicus : -----MPAATLREIPAVKIELPNGLT---VDQPVGLFINNKFVDSAAG : 40  
 S.pombe : -----MSTKLVDHVEITVPTGKT---YIQPVGLFINNHQVDSVHG : 37  
 S.reilianum : -----MPTLNLDLPNGIK---STIQADLFINNKFVPALDG : 32  
 U.hordei : -----MPTLNLDLPNGIK---STVQAELEFINNKFVPALDG : 32  
 V.alboatrum : -----MGLSAELKTEVVT-GTYTQPTGLFINNEWVEGVDK : 33

N.crassa : KTFEVINPATEEVIICSVHEATEKVDIAVAARAKAF--EGVWRDVTPEQQ-RGIYLLKLADL : 93  
 U.maydis : KTEATINPSTGKEIGQVAEASAKVDIAVKAAREAF--ETTNGENTPGDARGRLLIKLAEL : 91  
 A.delicata : KLIDVLNPTNGKLVGQIAEGSRADVDRAVEAAHRAF--NNSWGLKVGFERCKLLIRLAEL : 95  
 A.flavus : RTFETINPTNEKPIVAVQEAENDVEDAVKAARAAF--EGEWSKVTPSE-RGRLIVKLADL : 91  
 A.nidulans : KTFQVINPSNEKVIITSVHEATEKVDIAVAARAAF--EGPWRQVTPSE-RGILINKLADL : 91  
 A.oryzae : RTFETINPTNEKPIVAVQEAENDVEDAVKAARAAF--EGEWSKVTPSE-RGRLIVKLADL : 117  
 B.cinerea : KTFEVINPTEEVITTSVHEATEKVDIAVAARAKAF--EGEWRHVTEPEG-RGKLLVLAEL : 90  
 C.albicans : KTFEVIISPSTEEKITDVYEALIEDIDTAVEAAQAAY--HNGWAQGPPEQ-RSKVLFKLADL : 96  
 C.cinerea okayama : TTIDVVPNTNGKVIITSISEGVEKVDIAVEAAQKAF--ETTNGLNVSQSRSELLWKLATL : 95  
 C.immitis : KTFEVIINPHNEKPIVAVHEATEKVDIAVAARAKAF--EGEWNKVTETD-RGRMLNKLADL : 90  
 C.tropicalis : KTFEVYSPSTGKEITDVYSLAEDVDIAVDAAKTAY--DNGWASGAPTEQ-RAKILFKLADL : 96  
 F.mediterranea : LTYDVINPTTGKVTTKMCIGNKVIDLAVKAARAKAF--NTVWGLNCPGYERKLLMKLATL : 95  
 F.oxysporum : QKFEVINPSTEEVITTSVCEGTEKVIDLAVTAARAKAF--EGEWNKSTSPQA-RGNYLKLADL : 92  
 G.graminis : KTFEVINPTEEVICSVHEATEKVDIAVKAARAKAF--EGEWNKQTPPEQ-RGILLNKLADL : 92  
 M.larici-populina : KSIETINPSTGKPIGKVSIAASKEDVDIAVKSAAQAF--ENHWGKTEPAQRGRMLMDLADA : 95  
 P.brasiliensis : RTFESINPHNEKPIVAVYEATEKVDIAVAARAAF--KGPWKHVTPTN-RGRMLLKLADL : 90  
 P.chrysogenum : KTFETLNPTTEKPIITSVYEASEKVDIAVKAAREAF--EGPWNKVTPESD-RGRMLTKLADL : 90  
 P.nodorum : KTFEDVINPSTEEVICQVQEAASEKVDIAVAARAKAF--NGPWRKETPEN-RGRLIVKLADL : 92  
 P.teres : KTFEVINPSTEEVICHVAEATEKVDIAVAARAKAF--NGPWRKETPEN-RGRLIVKLADL : 92  
 S.commune : TTIDVINPTTGKLTISVAEATAADVDAVIAAQAAY--DTTWGLNAAGSRSELLYKLALL : 94  
 S.japonicus : GRIEVIDEATEKHLCDVVEAREEDIDVAVAAARAAHPDAPWRKFSSAQ-RGRCLSLADK : 100  
 S.pombe : GRVKVYSPSTEKLIICEVADADEEDVDIAVKAARAAQTDAPWRKFSSAQ-RGRCLSRADK : 97  
 S.reilianum : KTFEATINPATGKEIGQVAEASAKVDIAVKAAREAF--ETTNGENTPADARGRLLIKLAEL : 91  
 U.hordei : KTFEATVNPSTGKEIGQVAEASAKVDIAVKAAREAF--ETTNGENTPGDARGRLLIKLAEL : 91  
 V.alboatrum : KTFEVIINPSTEEVITTSVSEATEKVDIAVAARAKAF--NGVWRQVTPPEQ-RSIYLLKLADL : 91

N.crassa : LEKNLDLAAVEESLDNGKSIEMARG--DVGAVVGTIRYCGWADKLEKNTIDISPDSPHYTR : 153

U.maydis : VEANIDELAAIEESIDNGKAFSAKSEFVAAVAANLRYCGWADKNHGKVMVEVDTKRLNYTR : 152  
 A.delicata : IEEHADHLAAIEEALDNGKAFIARGFDIVESAACFRYYCGWADKLGKVIETNPTKFSYTQ : 156  
 A.flavus : FERDSIDILAAIEEALDNGKAFIMAKG-DVAAAAGCLRYCGWADKIHGQITIDTNPESLTYTR : 151  
 A.nidulans : MERDIDTLAAIEESIDNGKAFIMAKV-DLANSIGCLRYCGWADKIHGQITIDTNPETLTYTR : 151  
 A.oryzae : FERDSIDILAAIEEALDNGKAFIMAKG-DVAAAAGCLRYCGWADKIHGQITIDTNPESLTYTR : 177  
 B.cinerea : VEKNADLLAAVEESIDNGKAFISMAKG-DVAAVAGCLRYCGWADKIEGKVIDTDPPEYFTYTK : 150  
 C.albicans : IEENAELLAQIETWDNGKTSIQNARG-DVALTAAYFRSCCGWADKILGSOINTGNTHENYTR : 156  
 C.cinerea okayama : MEQHEELAAIEEATDNGKTFAWAKGTDVAFSINVIKYFAGWADKITGQTIETDERKLIYTR : 156  
 C.immitis : LEQHCDTLAAIEEALDNGKAVSMARV-DVANSAGCLRYCGWADKLGKVVDTDHETENYTR : 150  
 C.tropicalis : VEENLETLAQIETWDNGKSLQNARG-DIGFTAAYFRSCCGWADKILGSOINTGNSNYLTYTR : 156  
 F.mediterranea : MEEHHDLSALEEALDNGKTFEAWARNVDLPGSIQCLRYCGWADKNHGKVIETDEGKLAYTR : 156  
 F.oxysporum : AEKNLDLLAAVEESIDNGKSITNARG-DVGAVVGCCLRYCGWADKIEGKTIDIAADMFFHYTR : 152  
 G.graminis : VEKNLDLLAAVEESIDNGKAFAMAKG-DVGAVVGCCLRYCGWADKIEGKTIDIAADMFFHYTR : 152  
 M.larici-populina : IEENLDVLAIEESIDNGKAFSAKSEFVPEAAHCLRYCGWADKNHGKVIENVDSKMAFTR : 156  
 P.brasiliensis : MEQHVDTLAAIEEALDNGKAYSIAARI-DVANAAGCLRYCGWADKIHGKVIDTDTDSFNHYTR : 150  
 P.chrysogenum : FERDMETLASIEEALDNGKAVTMAKV-DIANAAGCLRYCGWADKITGQITIDTNSETLSYTR : 150  
 P.nodorum : FEKNADLLASVEEALDNGKAFNMAKNVDVPSCVGCCLRYCGWADKIEGKVVDTTPDTEFNHYTR : 153  
 P.teres : FEKNADLLAAVEEALDNGKAFSMARNVDVPAAGCLRYCGWADKIEGKVVDTSPDTEFNHYTR : 153  
 S.commune : MEQNLDELCAIEEALDNGKTFEAWARNVDVAFAIQTIKIFAGWADKIHGKVIETDESKLTYTR : 155  
 S.japonicus : VYEHLELLASVEETVDNGKSITLARG-DVRSAAECLRYCGWADKEYGQTIETDTTTFAYTR : 160  
 S.pombe : IEQNLLEYLASEETVDNGKSITLARG-DVQAAADCFRYCGWADKDYGQTIETDIKRFAYTR : 157  
 S.reilianum : VEANVDELAIEESIDNGKAFSAKSEFVAAVAANLRYCGWADKNHGKVMVEVDTSRNLNYTR : 152  
 U.hordei : VEEHVDELAIEESIDNGKAFSAKSEFVSAVAANLRYCGWADKNHGKVIENVDNKRLNYTR : 152  
 V.alboatrum : VEKNIDLLAAVEESIDNGKSITMAKG-DVGAVVGCCLRYCGWADKIEGKTIDVAPDMFFHYTR : 151

\*

N.crassa : QEPIGVCGQIIPWNEFLLMLAWKIGPALATGNTIVMKTAETPLSALVFAQFVKEAGFPAG : 214  
 U.maydis : HEPIGVCGQIIPWNEFLLMFAWKIGPALATGNTIVIKTAETPLSAIKMCELLIVEAGFPAG : 213  
 A.delicata : HEPIGVVCGQIIPWNEFLLMFAWKIGPALATGNTIVIKPSEFTPLSVLYLCQLFSEAGFPAG : 217  
 A.flavus : HEPIGVCGQIIPWNEFLLMWSWKIGPAIAAGNVVVIKTAETPLSGLYAAKLKEAGFPAG : 212  
 A.nidulans : HEPVGVCGQIIPWNEFLLMWSWKIGPAVAAGNTVVIKTAETPLSGLYAAKLKEAGFPAG : 212  
 A.oryzae : HEPIGVCGQIIPWNEFLLMWSWKIGPAIAAGNVVVIKTAETPLSGLYAAKLKEAGFPAG : 238  
 B.cinerea : QEPIGVCGQIIPWNEFLLMWSWKIGPAVATGNTVVIKTAETPLSALVAANLKEAGFPAG : 211  
 C.albicans : RVFL-VCGQIIPWNEFLLMASWKIGPVLATGNTIVIKTAESTPLSALYLSQLLVEAGMPKG : 216  
 C.cinerea okayama : HEPIGVVCGQIIPWNEFLLMLAWKIGPALATGNTIVIKPSEFTPLTAIMRCSLIQEAGFPAG : 217  
 C.immitis : HEAVGVCGQIIPWNEFLLMFAWKIGPALATGNTIVIKSAETPLSALYACQLVKEAGFPAG : 211  
 C.tropicalis : HEPIGVVCGQIIPWNEFLLMFAWKIGPVIATGNTIVIKPAEHTPLAVLYLAQLLVEAGMPKG : 216  
 F.mediterranea : HEPIGVVCGQIIPWNEFLLMLAWKIGPALATGNTIVIKPSEFTPLTALRMVGLIEAGFPAG : 217  
 F.oxysporum : SEPIGVCGQIIPWNEFLLMLAWKIGPALATGNTIVMKTAETPLSALVFTQFLEQAGFPAG : 213  
 G.graminis : QEPIGVCGQIIPWNEFLLMFAWKIGPALATGNTVVIKTAETPLSGLVMAQFVKEAGFPAG : 213  
 M.larici-populina : HEPIGVVCGQIIPWNEFLLMFAWKIGPALATGNTIVIKPAETPLTALFMAQLISKI-FPPG : 216  
 P.brasiliensis : HEPIGVCGQIIPWNEFLLMWSWKIGPVVATGNTVVIKSAETPLSALYAAKLVEAGFPAG : 211  
 P.chrysogenum : HEPVGVCGQIIPWNEFLLMFAWKIGPAIAAGNTVVIKTAETPLSGLYASKLIVEAGFPAG : 211  
 P.nodorum : KEPVGVCAQIIPWNEFLLMFAWKIGPAIATGNTVVIKTAETPLSAYIAANLKEAGFPAG : 214  
 P.teres : KEPIGVCGQIIPWNEFLLMFAWKIGPAIATGNTVVIKTAETPLSGLYIAAKLIVEAGFPAG : 214  
 S.commune : HEPIGVVCGQIIPWNEFLLMFAWKIGPALATGNTVVIKPSEFTPLTALRTCTLINEAGFPAG : 216  
 S.japonicus : HEPIGVCAQIIPWNEFLLMFAWKIGPALACGNTVVIKTAETPLSALMLTSFLIEECGFPAG : 221  
 S.pombe : HEPIGVCGQIIPWNEFLLMFAWKIGPAVACGNTIIVIKTAELTPLSALCLTKFVPECGFPAG : 218  
 S.reilianum : HEPIGVCGQIIPWNEFLLMFAWKIGPALATGNTVVIKTAETPLSAIKFCELLIVEAGFPAG : 213  
 U.hordei : HEPIGVCGQIIPWNEFLLMFAWKIGPALATGNTIVIKTAETPLSAIKLCELLIVEAGFPAG : 213  
 V.alboatrum : QEPIGVCGQIIPWNEFLLMLAWKIGPALATGNTVVIKTAETPLSGLVFNANLKEAGFPAG : 212

\*\*

\*\*\*

N.crassa : VLNIIISGEGRIAGAAMASHMDIDKVAFTGSTLVGRQIMKAAEENLKKVTTLELGGKSPNII : 275  
U.maydis : VVNIVISGEGPVAGAALISQHMIDKIAFTGSTLVGRNIMKAAASTNLKKVTTLELGGKSPNII : 274  
A.delicata : VVNIVVNGYGNVVGAAIISSEHMHLEKVAFTGSTLVGRAVMKAAASNLKKVTTLELGGKSPNII : 278  
A.flavus : VVNILISGEGRVAGAALISSEHMDIDKIAFTGSTLVGRMILQAAAKSNLKKVTTLELGGKSPNIV : 273  
A.nidulans : VINIVISGEGRTAGAALISSEHMDIDKIAFTGSTLVGRITLQAAAKSNLKKVTTLELGGKSPNIV : 273  
A.oryzae : VVNILISGEGRVAGAALISSEHMDIDKIAFTGSTLVGRMILQAAAKSNLKKVTTLELGGKSPNIV : 299  
B.cinerea : VVNILISGEGKIAGAALASHEMDVDKVAFTGSTLVGRQIMKAAAGSNLKKVTTLELGGKSPNIV : 272  
C.albicans : VINIVISGEGGATAGAALAKHPKIEKVAFTGSTLVTKIIMKLAESNLKKVTTLELGGKSPNIV : 277  
C.cinerea okayama : VVNIVTGYGNTVGAALISSEHPKIEKVAFTGSTLVGRKIMEAAAKSNLKNVTTLELGGKSPNVI : 278  
C.immitis : VLNIVISGEGRVAGAALISSEHMDIDKVAFTGSTLVGRQILQAAAKSNLKKVTTLELGGKSPNIV : 272  
C.tropicalis : VVNIVPGEFATTGAALASHPNIDKVAFTGSTLVTKVIMKLAADSNLKKVTTLELGGKSPNIV : 277  
F.mediterranea : VVNIIINGLGPDAGAALAEHPDIEKVAFTGSTLVGRIMEAAAKTNLKKVTTLELGGKSPNII : 278  
F.oxysporum : VFNLVISGEGKTAGAALSAHMDVDKIAFTGSTLVGRQIMKSAASNLKKVTTLELGGKSPNIV : 274  
G.graminis : VLNIVVSGEGKIAAGAALSAHMDVDKVAFTGSTLVGRITMKAASNLKKVTTLELGGKSPNIV : 274  
M.larici-populina : VINIIVGLGPVTVGAMSHHMGIEKIAFTGSTLVGRMIMKAAEENLKKVTTLELGGKSPNII : 277  
P.brasiliensis : VINIIVISGEGRVAGAALISSEHMDIDKVAFTGSTLVGRQILQAAAKSNLKKVTTLELGGKSPNIV : 272  
P.chrysogenum : VINIVISGEGRVAGAALISSEHMDIDKVAFTGSTLVGRMILQAAAKSNLKKVTTLELGGKSPNIV : 272  
P.nodorum : VINIVITGEGKIAAGAALSAHMDVDKIAFTGSTLVGRQIMKSAAGSNLKKVTTLELGGKSPNIV : 275  
P.teres : VVNIIITGLCRVAGAALSAHMDIDKIAFTGSTLVGRQIMKAAAGSNLKKVTTLELGGKSPNIV : 275  
S.commune : VVNLIIVGYGHTVGAAMSSHMDIHKIAFTGSTLVGRKIMESAASNLKVTTTLELGGKSPNII : 277  
S.japonicus : VINIVVSGYKHAAGAALSAHMDVDKIAFTGSTLVGRMIMRAAASNLKMCVTTLELGGKSPNIV : 282  
S.pombe : VINIVLSGDGRRCCGNALISSEHMDIDKVAFTGSTLVGRMVMRAAASNLKKVTTLELGGKSPNIV : 279  
S.reilianum : VVNIVISGEGPVAGAALISQHMIDKIAFTGSTLVGRNIMKAAASTNLKKVTTLELGGKSPNII : 274  
U.hordei : VVNIVISGEGPVAGAALISQHMIDKIAFTGSTLVGRNIMKAAASTNLKKVTTLELGGKSPNIV : 274  
V.alboatrum : VFNLIINGEGKVAAGAALISSEHMDIDKVAFTGSTLVGRQIMKAAASNLKKVTTLELGGKSPNIV : 273

\*

N.crassa : FNDADIDQALDQAVNWFNGIYFNHGQTCAGSRVYVQEGYDKFVAAFKQRAQQNKVGDPPHDE : 336  
U.maydis : FKDADLDQAVRWSAFGIMENHGQCCAGSRVYVEESIYDAFMEKMTAHCKALQVGDPPFSAN : 335  
A.delicata : FEDADVDQAIRWAAGLGFENHGQCCAGSRVYVQESIYDSFVEKFKAHVKTLKVGDPFDKE : 339  
A.flavus : FDDADIDNALSWSNFGIFFENHGQCCAGSRLLVQEGIHDKFVARFKERAANKLGNPFAD : 334  
A.nidulans : FDDADIDNALSWSNFGIFFENHGQCCAGSRLLVQEGIHDKFVARFKERAQKNKVGDPFEQD : 334  
A.oryzae : FDDADIDNALSWSNFGIFFENHGQCCAGSRLLVQEGIHDKFVARFKERAANKLGNPFAD : 360  
B.cinerea : FNDADIENALSWVNFGLFFENHGQTCAGSRVYVQDGIYDKFVESFKARAIANKVGDPPHHE : 333  
C.albicans : FNDADLDKTIQNLIVSIFYNHSCVCCAGSRLLIQSGVYDQVVEKFKAAESVKVGNPFDED : 338  
C.cinerea okayama : FNDADIDQAVNVAHGLFWNHGQCCAGSRIFVQSGIYDEFLKRF TAKAAAIRVGDPPFGVE : 339  
C.immitis : FNDADIDNALSWSNFGIYFNHGQCCAGSRLLVQEGIYDEFLQRFKERAMKNKVGDPFNPD : 333  
C.tropicalis : FNDADLDKTVHNLVSGVFSNSGETCAAGARVLVQSGVYDEVVAREKKAEEAIKVGDPFEFE : 338  
F.mediterranea : FDDADIQQAVDWAAGHGFVFNHGQCCAGTRIFVQEKIYDEFLQKFTAKAQGLKIGDPPGVD : 339  
F.oxysporum : FDDADIEEAINWVNFGLIYFNHGQCCAGTRIFVQEGIYDKFLAAFKKRAEENKVGDPFNNE : 335  
G.graminis : FNDADIEQAVSWVNFGLIYFNHGQCCAGSRVYVQEDIYDKFVAAFKARAEKNAVGDPPKDD : 335  
M.larici-populina : FDDADLDQAVKWSGFGIFFENHGQCCAGSRVVFHEAVYDQFMVKFEEYAKSFKVGDPFSKN : 338  
P.brasiliensis : FNDADIDNALSWSNFGIYFNHGQCCAGSRLLVEEGIYDTFLERFKARALQNKVGDPPHQD : 333  
P.chrysogenum : FEDADIDNALSWSNFGIFFENHGQCCAGSRLLVQESIYDKFVARFKERAQNKLGNPFEGD : 333  
P.nodorum : FADADLDEAINWVNFGLIYFNHGQCCAGSRIFVQESIYDKFIARFRERAAQNAVGDPPESKD : 336  
P.teres : FADADLDEAINWVNFGLIYFNHGQTCAGSRIFVVEESIYDKFIERFRERAAQNKVGDPPFAE : 336  
S.commune : FDDADLEQAVNWAAGHGFVFNHGQCCAGSRIFVQAGIYDKFLEAFTARTRGIKVGDPPFGDN : 338  
S.japonicus : FDDADLDKAVANTNYGIEFYNGQOVCCAGSRLLVQEGIYDEFVKRMVAKAKTLKVGDPFDED : 343  
S.pombe : FNDADLDSAAVNTNYGIEFYNSCOVCCAGSRVYVQEDVYDEFIKRMVAKAKTLKVGDPFAED : 340  
S.reilianum : FKDADLDQAVRWSAFGIMENHGQCCAGSRVYVEDSIYDAFMEKMTAYCKALQVGDPPFAAT : 335  
U.hordei : FKDADLDQAVKWSAFGIMENHGQCCAGSRIFVVEESIYDAFMEKMTAHCKALPVGDPPFAAN : 335  
V.alboatrum : FNDADIEQALSWVNFGLIYFNHGQCCAGTRIFVQEGIYDKFLEAFKKRAQENKVGDPFHDE : 334

\*

N.crassa : TFQGPQVSQLOYDRIMGYIKAKKEECATVETGGERHGDGKGYFIOPTIFITNVRHDMKIMKEE : 397  
U.maydis : TFQGPQVSQLOYDRIMEYIESCKKD-ANLALGGVRRKNEGYFIEPTIFTDVPHDAKIAKEE : 395  
A.delicata : TFQGPQVSQLOFDRIMGYIESGKAKCATVELGGERHNEGYFIEPTVFTNPKPDMQIVREE : 400  
A.flavus : TFQGPQVSQLOFDRIMEYINHCKQECATVATGGERHGTTEGYFIOPTVFTDVSMDKIAKEE : 395  
A.nidulans : TFQGPQVSQLOFDRIMEYINHCKKACATVATGGDRHGNEGYFIOPTVFTDVTSDMKIAQEE : 395  
A.oryzae : TFQGPQVSQLOFDRIMEYINHCKQECATVATGGERHGTTEGYFIOPTVFTDVSMDKIAKEE : 421  
B.cinerea : TFQGPQVSQLOYDRIMGYIDECRKSACATVVTGGERHGDGKGYFIOPTIFSDVTEDMKIQEE : 394  
C.albicans : TEMGAQVSDVQLSKILKYVESCKSQCATVVTGGARADGKGYFVKPTIFADVKKDMDIVREE : 399  
C.cinerea okayama : VDQGPQVSQIOYDRIMGYIDSCKADCATVHLGGERHGTTEGYFIEPTIFTDVKKPDMKIVREE : 400  
C.immitis : TFQGPQISQLOFDRVMGYIDQCKKACAKVEIGGERLGTTEGYFIOPTIFSNVNEEDMSIVKEE : 394  
C.tropicalis : TFMGSQVNEIQFSKILEFVESCKEQCATLVVTGGERIGDKGYFIKPTIFADVKKDMTIFKEE : 399  
F.mediterranea : TYQGPQVSQPOFDRIMGYIESCKQECATIHGGSRFGKEGYFIEPTIFINTRPDMKIVREE : 400  
F.oxysporum : TFQGPQVSQLOYDRIMGYIKAGKDECATIETGGERLGNKGYFIKPTIFSNVRPDMKIMQEE : 396  
G.graminis : TFQGPQVSQLOYDRIMEYIKAKKDECATVETGGERHGDGKGYFIOPTIFITNVRNDMKIMQEE : 396  
M.larici-populina : TFQGPLVSQLQFDRVMGYIQSKEDCAKCIIGGNRYGNEGYFIEPTIFTDVKKPSMKIMKEE : 399  
P.brasiliensis : TFQGPQVSQLOFDRIMGYIRECKAAGAKVEIGGERLGNKGYFIOPTIFSNVTEEDMKIVKEE : 394  
P.chrysogenum : TFQGPQVSQLOFDRIMEYINHCKTECATVALGGERHGTTEGYFIOPTVFTDVTTPDMKIAQEE : 394  
P.nodorum : TFQGPQVSQLOFDRIMSYIEECKKSCATIETGGERKGDGKGYFIEPTIFSNVTEEDMTIQQEE : 397  
P.teres : TFQGPQVSQLOFDRIMGYIDECRKECATIETGGERKGDGKGYFIEPTIFSNVTEEDMKIQKEE : 397  
S.commune : VDQGPQVSQOQYDRIMSYIDTCKQECATCHIIGGNRVGDEGYFIEPTIFTDVKKPDMTIVREE : 399  
S.japonicus : TFQGAQVSKAQYERILSYIDLGLEHCAKLEIGGERHGDGKGYFIEPTILSNVTEEMAVGKEE : 404  
S.pombe : TFQGAQVSKQYERIVSYIESCIAHCAKLEIGGERHGNLGYFVEPTILSNVTEEMAVGKEE : 401  
S.reilianum : TFQGPQVSQLOYDRIMEYIETCKKE-ANLHLGGVRRKGEQGYFIEPTIFTDAPHESKIAKEE : 395  
U.hordei : TFQGPQVSQLOYDRIMEYIESCKKD-ANLHLGGVRRKNEGYFIEPTIFTDVPHDAKIAKEE : 395  
V.alboatrum : TFQGPQVSQLOFDRIMEYIKICEECCATVETGGERHGDGKGYFIOPTIFSNVKADMKIMQEE : 395

\*  
N.crassa : IFGPVCAVAKFSTEEVVKLGNDSNYGLAAAVHTKDLNTAIRVSNHLRAGTVWVNTYNALH : 458  
U.maydis : IFGPVVVVSKFKDEKDLIRIANDSIYGLAAAVFSRDISRAIETAHKLKAGTVWVNCYNQLI : 456  
A.delicata : IFGPVVVLAKFKDEDDIIAQANDSMYGLAAAVFSQNVSRALSVAQRLHAGTVWVNHYNKLEH : 461  
A.flavus : IFGPVVTIQKFKDEEEAIIKIGNSSSYGLAAAVHTKNVNTAIRVSNSLRAGTVWVINCYNMIN : 456  
A.nidulans : IFGPVVTIQKFKDEEEAIIKIGNSTDYGLAAAVHTKNVNTAIRVSNALKAGTVWVNNYNMIS : 456  
A.oryzae : IFGPVVTIQKFKDEEEAIIKIGNSSSYGLAAAVHTKNVNTAIRVSNSLRAGTVWVINCYNMIN : 482  
B.cinerea : IFGPVCSIAKFKSTEEIIKIGNSNYGLASAVHTQNLNTALRVSNALKAGTVWVNCYNMLH : 455  
C.albicans : IFGPVVTLIKEEDTVDEAVELANDSDYGLAAGIHSADVNCIDVANRVKAGTVWVNTYNDFH : 460  
C.cinerea okayama : IFGPVGVLIKFEDEADVIRQANDTVYGLAAAVFSQINRAIETAHKMQAGTVWVNCANQLH : 461  
C.immitis : IFGPVCSIQTEKTEEDAIIKIGNSTSYGLAAAIHTKDLNTAIRVSNELRAGTVWVNCYNLLS : 455  
C.tropicalis : IFGPVASVIKEDTIDEAIALANDSEYGLAAGVHTTNINTGLHVANNIKSGSVWVNTYSELH : 460  
F.mediterranea : IFGPVGVVIKFHEDEEDVIRQANDTHYGLAAAVFSKNIDRALRVVAHRLHAGTAWINCANTLN : 461  
F.oxysporum : IFGPVCAISKFKDEKEVIDLAHDTAYGLAAAVHTKNLNTALRVSNALKAGTVWVNCYNMLH : 457  
G.graminis : IFGPVCAIAKFKTEEDVIMHGNDSYGLAAAVHTKDLNTAIRVSNSLKAGTVWVNCYNMLH : 457  
M.larici-populina : IFGPVVAVTKFESSEEDLLKVANGSIYGLAAAVFSKDIQRSIKVANELKAGTVWVNCYNKLEH : 460  
P.brasiliensis : IFGPVCCVQKFKNEDEAIIKIGNSTSYGLAAAVHTTDLNTAIRVSNELKAGTVWVNNYNMIS : 455  
P.chrysogenum : IFGPVIAVTKFKDEADAIKIGNSTSYGLAAAVHTKNINTAIRVSNALKAGTVWVNNYNMIS : 455  
P.nodorum : IFGPVCTISKFKTKADVLIKIGNSTTYGLAAAVHTTNLNTALEVANALRAGTVWVNTYNALH : 458  
P.teres : IFGPVCTIAKFKTKEEVIRIGNASIIYGLAAAVHTTNLNTALEVANALRAGTVWVNTYNSLH : 458  
S.commune : IFGPVGVVIKFTEDEEDVIRQANDTVYGLAAAVFTQDINRAIETAHKLQAGTAWINCYNQLH : 460  
S.japonicus : IFGPVVAIKFKETIEEAIRRRANNTSYGLASGVHTRSIDTALQVSNALQAGTVWVNCYNVLEH : 465  
S.pombe : IFGPVLAVIKFKETIEEAIRRRGNNTSYGLAAGVHTNNITNAIKVSNALQAGTVWVNCYNLLEH : 462  
S.reilianum : IFGPVVVVSKFKDEKDLIRIANDSIYGLAAAVFSRDISRAIETAHKLKAGTVWVNCYNQLV : 456  
U.hordei : IFGPVVVVSKFKDEKDLIRIANDSIYGLAAAVFSRDISRAIETAHKLKAGTVWVNNYNQLN : 456  
V.alboatrum : IFGPVCAIAKFKDEDEVLALGNDSYGLAAAVHTKDLNTAIRVSNQKAGTVWVNCYNMLH : 456

\*

N.crassa : HQLPFGGYKESGIGREIAGEAALANYTQCKSVAIKLN----- : 494  
 U.maydis : PQVPFGGYKASGIGREIAGEYALSNTYNIKAVHVNLSQPAPI : 497  
 A.delicata : PQVPFGGFKQSGIGREIAGEYALANYTENVKAVQVNIHDKL-- : 500  
 A.flavus : YQAPFGGFKESGIGREIAGESYALENYTQVKTVEHYRLGDALFA : 497  
 A.nidulans : YQAPFGGFKQSGIGREIAGESYALENYTQIKTVEHYRLGDALFA : 497  
 A.oryzae : YQAPFGGFKQSGIGREIAGESYALENYTQVKTVEHYRLGDALFA : 523  
 B.cinerea : HOVPFGGYKESGIGREIAGEAALSNTYQTKSVRIRLGDALFG : 496  
 C.albicans : PMVPFGGFKASGIGREIAGEEVLHEYTQVRAVRMKINPPN-- : 499  
 C.cinerea okayama : ANVPFGGFKQSGIGREIAGEYALHNTYENVKAVHVNIGHVM-- : 500  
 C.immitis : YQTPFGGFKESGIGREIAGEYALDNTYQVKA VRIRLGDAMFG : 496  
 C.tropicalis : PMVPFGGFKSSGIGREIAGEESFKEYTEVRSVRVKLYPDA-- : 499  
 F.mediterranea : TQIPFGGYKQSGIGREIAGEYALANYSAIKAVHVNIGMSI-- : 500  
 F.oxysporum : HQLPFGGYKESGIGREIAGEAALANYTONKSVAIKLY----- : 493  
 G.graminis : HQLPFGGFKESGIGREIAGEAALANYTQTKSVAIRLGGALF- : 497  
 M.larici-populina : TQVPFGGFKQSGIGREIAGEYALANYTAVKAVHINLGEKL-- : 499  
 P.brasiliensis : YQTPFGGFKESGIGREIAGEYALDNTYQVKA VRIRLGDALFG : 496  
 P.chrysogenum : YQAPFGGFKESGIGREIAGESYALENYTQVKTVEHYRLGDALF- : 495  
 P.nodorum : WALPFGGYKQSGIGREIAGEAALDNTYLTQTKTVSIRLGDVLF : 499  
 P.teres : WQLPFGGYKESGIGREIAGEAALDNTYLTQTKTVSIRLGDVIF : 499  
 S.commune : AQVPFGGFKQSGIGREIAGEYALENYTENVKAVHVNLRHRM-- : 499  
 S.japonicus : HQIPFGGYKESGIGREIAGESYGLSNTYQTKAVHINTGMNLPL : 506  
 S.pombe : HQIPFGGYKESGIGREIAGESYGLTNTYQTKAVHINLGMDSPI : 503  
 S.reilianum : PQVPFGGYKASGIGREIAGEYALNTYNIKAVHVNLSQPAPI : 497  
 U.hordei : PQVPFGGYKASGIGREIAGEYALANYTENVKAVHVNLSVPAPI : 497  
 V.alboatrum : HOVPFGGFKESGIGREIAGEAALSNTYTONKSVAIRLGGAIY- : 496
