# Supplementary material for: Characterization of indole-3-pyruvic acid pathway-mediated biosynthesis of auxin in Neurospora crassa
Source: PubMed Central journal article supplement (PMC5805262; doi:10.1371/journal.pone.0192293), 2018-02-08
Supplement: pone.0192293.s004.pdf [file pone.0192293.s004.pdf]

\* \* \*

```
=====
N. crassa : -----MGSQERRFNVKKIATV CAGPACL : 23
A. nidulans : -----MALSKHIIHRIAVT CAGPACL : 20
A. terreus : -----MAMSREIIRVAII CAGPACL : 20
B. dermatitidis : -----MRALSSHPIIRVAII CAGPSGL : 22
C. albicans : -----MTKEQIDEPRYKRIAVT CAGPTGL : 24
C. cinerea okayama : MKGLFVYLAVLVSSGVTQQEPLQWGSSSSPRPQESYEFKWPVKVAVTCTGVGGL : 56
C. globosum : -----MGSQQPERFDVKVAII CAGPCGL : 24
C. guilliermondii : -----MIPKSIATV CAGPSCA : 16
C. immitis : -----MAQRFPHVRTVAIV CAGAGGL : 21
C. neoformans grubii : -----MCSEEQFHHFNRSVIRVAII CAGPSGT : 27
C. tropicalis : -----MTKQQLYDRVAII CAGPTGL : 21
F. graminearum : -----MALADKLDVRIATV CAGPSGL : 22
F. oxysporum : -----MALADKLDVRIATV CAGPSGL : 22
F. verticillioides : -----MGSLTQPTPFVHKIATV CAGPTGL : 25
H. capsulatum : -----MRGISSPRIIRVAII CAGPSGL : 22
L. elongisporus : -----MTVSVLKQPLYNRVAII CAGPAGL : 24
M. canis : -----MTRITPPVIRVAII CAGACGL : 21
M. gypseum : -----MTRATPPVIRVAII CAGACGL : 21
M. oryzae : -----MVLACFDVVKRIATV CAGPCGL : 22
P. graminis tritici : -----MHENSLETDVVI CAGASGL : 21
P. nodorum : -----MTSEMTPLNFKALSIAIV CAGPSGV : 25
P. triticina : -----MMGNQRTKRTRMEEETDVVVI CAGASGL : 29
P. tritici-repentis : -----MTENERISIRATVAVV CAGPSGV : 24
Schizosaccharomyces pombe : -----MSLCLPTIRKIAII CAGPSGL : 21
S. japonicus : -----MVSPIVRSVAII CAGPSGL : 19
S. octosporus : -----MSSSLIRSIATV CAGPSGL : 19
S. pombe : -----MCLPTIRKIAII CAGPSGL : 19
S. punctatus : -----MKDILIV CAGPSGL : 15
S. sclerotiorum : -----MNFKLRFNVKKIATV CAGPSGL : 24
T. rubrum : -----MTRATPPVIRVAII CAGACGL : 21
U. reesii : -----MSPQTFNSIRKVAII CAGAGGL : 22
V. alfalfae : -----MGSYAPLPFDIKKIAII CAGPCGL : 24
V. dahliae : -----MSPHGLESRLHVSRAVIV CAGASGL : 25
```
