# Supplementary material for: Characterization of indole-3-pyruvic acid pathway-mediated biosynthesis of auxin in Neurospora crassa
Source: PubMed Central journal article supplement (PMC5805262; doi:10.1371/journal.pone.0192293), 2018-02-08
Supplement: pone.0192293.s016.pdf [file pone.0192293.s016.pdf]

**Detailed specification of *Neurospora crassa* strains:**

| <b>Serial</b> | <b>FGSC Number</b> | <b>Genotype/<br/>Locus</b>   | <b>Classical<br/>Gene<br/>name</b> | <b><i>N. crassa</i><br/>Gene<br/>name</b> | <b>Mating<br/>Type</b> | <b>Linkage<br/>Group</b> |
|---------------|--------------------|------------------------------|------------------------------------|-------------------------------------------|------------------------|--------------------------|
| 1.            | 2489               | <i>N. crassa</i> 74-OR23-1VA | -                                  |                                           | A                      | -                        |
| 2.            | 4200               | <i>N. crassa</i>             | -                                  |                                           | a                      | -                        |
| 3.            | 12555              | NCU06112                     | <i>tdc2</i>                        | <i>gdc3</i>                               | a                      | VII                      |
| 4.            | 12556              | NCU06112                     | <i>tdc2</i>                        | <i>gdc3</i>                               | A                      | VII                      |
| 5.            | 12919              | NCU00378                     | <i>iad3</i>                        | <i>ahd2</i>                               | a                      | III                      |
| 6.            | 12921              | NCU03415                     | <i>iad1</i>                        | <i>cbs3</i>                               | a                      | II                       |
| 7.            | 12922              | NCU03415                     | <i>iad1</i>                        | <i>cbs3</i>                               | A                      | II                       |
| 8.            | 14354              | NCU09648                     | <i>iad2</i>                        | <i>ahd3</i>                               | A                      | IV                       |
| 9.            | 16277              | NCU04092                     | <i>ami1</i>                        | <i>naa2</i>                               | A                      | VI                       |
| 10.           | 18065              | NCU02193                     | <i>ipd</i>                         | <i>cfp</i>                                | a                      | VII                      |
| 11.           | 18066              | NCU02193                     | <i>ipd</i>                         | <i>cfp</i>                                | A                      | VII                      |
| 12.           | 18224              | NCU08275                     | <i>tdc1</i>                        | <i>aad1</i>                               | a                      | IV                       |
| 13.           | 18225              | NCU08275                     | <i>tdc1</i>                        | <i>aad1</i>                               | A                      | IV                       |
| 14.           | 20239              | NCU01106                     | <i>iaam</i>                        | <i>lao2</i>                               | a                      | V                        |
| 15.           | 21462              | NCU03755                     | <i>yuc</i>                         | <i>mox2</i>                               | a                      | V                        |
| 16.           | 21463              | NCU03755                     | <i>yuc</i>                         | <i>mox2</i>                               | A                      | V                        |
| 17.           | 22136              | NCU09116                     | <i>tam1</i>                        | <i>aro8</i>                               | A                      | I                        |
