# Supplementary material for: Characterization of indole-3-pyruvic acid pathway-mediated biosynthesis of auxin in Neurospora crassa
Source: PubMed Central journal article supplement (PMC5805262; doi:10.1371/journal.pone.0192293), 2018-02-08
Supplement: pone.0192293.s017.pdf [file pone.0192293.s017.pdf]

## Description of primers used in PCR to check for the knockout strains

| Sr. No. | Primer name | Sequence (5' ----> 3')        | Description                                                             |
|---------|-------------|-------------------------------|-------------------------------------------------------------------------|
| 1.      | PS2660      | TCGAATCCATCACCCCTCAAG         | Fwd. NCU09116 ORF Posn. 392<br>( <i>tam1</i> )                          |
| 2.      | PS2661      | AATACGGCTCGTCTCAATC           | Rev. NCU09116 ORF Posn. 1000<br>( <i>tam1</i> )                         |
| 3.      | PS2662      | AAACCTCTACCGGTCTCTTC          | Fwd. NCU01106 ORF Posn. 773<br>( <i>iaam</i> )                          |
| 4.      | PS2663      | CGTCTTTAGAGGGCAAAGTC          | Rev. NCU01106 ORF Posn. 1390<br>( <i>iaam</i> )                         |
| 5.      | PS2670      | AACCCGGTTCACGGTACTCC          | Fwd. NCU04092 ORF Posn. 796<br>( <i>ami1</i> )                          |
| 6.      | PS2671      | AGGTCAGGTTGCCGGTTTCC          | Rev. NCU04092 ORF Posn. 1375<br>( <i>ami1</i> )                         |
| 7.      | PS2738      | TAGGAGGGCGTGGATATGTC          | Fwd. HygB ORF posn. 122                                                 |
| 8.      | PS2739      | CGTCTGCTGCTCCATAACAAG         | Rev. HygB ORF posn. 738                                                 |
| 9.      | PS2740      | GCAGAACCAATGACCTTAGC          | Fwd. to amplify NCU01106 ( <i>iaam</i> )<br>5' UTR along with HygB gene |
| 10.     | PS2741      | ATCCACTTAACGTTACTGAAATCTCCAAC | Rev. specifically on HygB gene                                          |
| 11.     | PS2742      | CCTGAACTGGTATCGAAAGG          | Fwd, to amplify NCU09116 ( <i>tam1</i> )<br>5' UTR along with HygB gene |
| 12.     | PS2743      | ATGCTATCTGACCTGAGACG          | Fwd. to amplify NCU04092 ( <i>ami1</i> )<br>5' UTR along with HygB gene |
| 13.     | PS2755      | CAAGTGCCTGCCGAGTATC           | Fwd. (NCU02193) ORF posn 615<br>( <i>ipd</i> )                          |
| 14.     | PS2756      | CGACGAACAGGCTGGTCTTG          | Rev. (NCU02193) ORF posn 1171<br>( <i>ipd</i> )                         |
| 15.     | PS2757      | AAGTGTTAGGTCGCAGTAGG          | Fwd. to amplify NCU02193 ( <i>ipd</i> )<br>5' UTR along with HygB gene  |
| 16.     | PS2760      | CCTATGATGCCGTTGTCGTG          | Fwd. (NCU03755) ORF posn 521<br>( <i>yuc</i> )                          |

|     |        |                      |                                                                         |
|-----|--------|----------------------|-------------------------------------------------------------------------|
| 17. | PS2761 | AAATCGCTGCCTGACTCTCC | Rev. (NCU03755) ORF posn 1078<br>( <i>yuc</i> )                         |
| 18. | PS2809 | GCTCATTTACGGTCTGTTCC | Fwd. to amplify NCU03755 ( <i>yuc</i> )<br>5' UTR along with HygB gene  |
| 19. | PS2811 | CTATTGATCGTCAGCCAAGG | Fwd. to amplify NCU03415 ( <i>iad1</i> )<br>5' UTR along with HygB gene |
| 20. | PS2919 | CTGGCGTTCTCAACATCATC | Fwd. Primer for <i>iad1</i> (NCU03415)<br>ORF Posn. 638                 |
| 21. | PS2920 | GATGAAGTAGCCCTTGTCAC | Rev. Primer for <i>iad1</i> (NCU03415)<br>ORF Posn. 1137                |
| 22. | PS2928 | AACTACCCGCTAGATATGGC | Fwd primer for mid part of <i>iad3</i><br>ORF                           |
| 23. | PS2929 | CCTCTTCCTTTCCGACATTG | Rev primer for mid part of <i>iad3</i><br>ORF                           |
| 24. | PS2930 | GTTGGACGACGAGGTGATTG | Fwd primer for mid part of <i>iad2</i><br>ORF (posn. 454)               |
| 25. | PS2931 | CGCCGAACTTGAACGTCTTG | Rev primer for mid part of <i>iad2</i><br>ORF (posn. 1028)              |
| 26. | PS2936 | AGGTACCAACAGTACCATGC | Fwd. To amplify NCU00378 ( <i>iad3</i> )<br>5' UTR along with HygB gene |
| 27. | PS2937 | GTCAGCAGAATACTTGGACC | Fwd. To amplify NCU09648 ( <i>iad2</i> )<br>5' UTR along with HygB gene |
